1 COVID-19 and acute kidney injury in German hospitals

2 2020

3 COVID-19 and AKI in Germany

4

5

6

7

8

9 Victor Walendy<sup>1</sup>, Matthias Girndt<sup>1</sup>, Daniel Greinert<sup>1</sup>

10

11 <sup>1</sup>

12 Department of Internal Medicine II

13 Medical Faculty of the

14 Martin-Luther-University Halle-Wittenberg

15 Ernst-Grube-Straße 40

16 D-06120 Halle (Saale)

17 Germany

18

19 Corresponding author:

20 [Victor.walendy@uk-halle.de](mailto:Victor.walendy@uk-halle.de)

21

## 22 Abstract

### 23 Introduction

24 The SARS-CoV-2 pandemic is a major challenge for patients, healthcare professionals, and  
25 populations worldwide. While initial reporting focused mainly on lung involvement, the  
26 ongoing pandemic showed that multiple organs can be involved, and prognosis is largely  
27 influenced by multi-organ involvement. Our aim was to obtain nationwide retrospective  
28 population-based data on hospitalizations with COVID-19 and AKI.

### 29 Materials & Methods

30 We performed a query of G-DRG data for the year 2020 via the Institute for the hospital  
31 remuneration system (Institut für das Entgeltsystem im Krankenhaus GmbH, InEK) data  
32 portal and therefore included hospitalizations with a secondary diagnosis of RT-PCR proven  
33 COVID-19 infection, aged over 15 years. We included hospitalizations with acute kidney  
34 injury (AKI) stages 1 to 3. Age-specific and age-standardized hospitalization and in-hospital  
35 mortality rates (ASR) per 100.000 person years were calculated, with the German  
36 population of 2011 as the standard.

### 37 Results

38 In 2020, there were 16.776.845 hospitalizations in German hospitals. We detected 154.170  
39 hospitalizations with RT-PCR proven COVID-19 diagnosis. The age-standardized  
40 hospitalization rate for COVID-19 in Germany was 232,8 per 100.000 person years (95% CI  
41 213,6-233,9). The highest proportion of hospitalizations associated with COVID-19 were in  
42 the age group over 80 years. AKI was diagnosed in 16.773 (10,9%) of the hospitalizations

43 with COVID-19. The relative risk of AKI for males was 1,49 (95%CI 1,44-1,53) compared to  
44 females. Renal replacement therapy (RRT) was performed in 3.443 hospitalizations, 20,5%  
45 of the hospitalizations with AKI. For all hospitalizations with COVID-19, the in-hospital  
46 mortality amounted to 19,7% (n= 30.300). The relative risk for in-hospital mortality was 3,87  
47 (95%CI 3,80-3,94) when AKI occurred. The age-standardized hospitalization rates for COVID-  
48 19 took a bimodal course during the observation period. The first peak occurred in April  
49 (ASR 23,95 per 100.000 person years (95%CI 23,58-24,33)), hospitalizations peaked again in  
50 November 2020 (72,82 per 100.000 person years (95%CI 72,17-73,48)). The standardized  
51 rate ratios (SRR) for AKI and AKI-related mortality with the overall ASR for COVID-19  
52 hospitalizations in the denominator, actually decreased throughout the observation period  
53 and remained lower in autumn than they were in spring. In contrast to all COVID-19  
54 hospitalizations, the SRR for overall mortality in COVID-19 hospitalizations diverged from  
55 hospitalizations with AKI in autumn 2020.

## 56 Discussion

57 Our study for the first time provides nationwide data on COVID-19 related hospitalizations  
58 and acute kidney injury in Germany in 2020. AKI was a frequent complication and associated  
59 with high mortality. We observed a less pronounced increase in the ASR for AKI-related  
60 mortality during autumn 2020. The proportion of AKI-related mortality in comparison to the  
61 overall mortality decreased throughout the course of the pandemic.

62

63

## 64 Introduction

65 The SARS-CoV-2 pandemic is a major challenge for patients, healthcare professionals, and  
66 populations worldwide. While initial reporting focused mainly on lung involvement, the  
67 ongoing pandemic showed that multiple organs can be involved, and prognosis is largely  
68 influenced by multi-organ involvement. According to published data, the kidney is the  
69 second most involved organ. In a study from the New York City area, 22,2% of hospitalized  
70 patients showed acute kidney injury (AKI)(1). A meta-analysis (2) confirmed the high AKI  
71 rate among COVID-19 patients. In contrast to this, there is also data with lower incidence of  
72 AKI(3,4) especially early analysis from Wuhan, China did not show high incidence rates of  
73 AKI (3–5). However, different definitions of AKI complicate comparability. In critically ill  
74 patients with COVID-19 as many as 55 to 90% experienced AKI (6–8), of whom 21 to 37%  
75 required renal replacement therapy (RRT) (6,8,9). The mortality rates of patients with acute  
76 kidney injury are significantly higher than in patients without AKI. In a study by Chan et al.  
77 (9), the in-hospital mortality was 50% among patients with, versus 8% among those without  
78 AKI. An analysis by Fisher et al. (8) found similar mortality rates (52% vs. 19.6%). In addition,  
79 the length of stay (LOS) was markedly prolonged when AKI occurred (9,10).

80 The German healthcare system offers comprehensive insurance coverage and, by  
81 international comparison, a high level of healthcare services. Throughout the COVID-19  
82 pandemic there were no apparent acute care resource limitations, and the hospital  
83 capacities were at their limit but not overwhelmed. Nationwide unselected data, especially  
84 covering a longer time interval is not available. There is one observational study, which  
85 included 10.021 hospitalizations (11). The data from this study was obtained from one

86 German health insurance company and covered a short period of time (from February 26  
87 until April 19, 2020). In this study, AKI was not addressed.

88 Our aim was to obtain nationwide retrospective population-based data on hospitalizations  
89 with COVID-19 and AKI. Our query covered data from the year 2020 and contains, to our  
90 knowledge, the most comprehensive data regarding patients with COVID-19 and AKI in  
91 Germany.

## 92 **Materials & Methods**

### 93 **Data Source**

94 In accordance with the German Hospital Financing Act (KHG), a universal, performance-  
95 based remuneration system was introduced for general hospital services. The basis for this  
96 is the German-Diagnosis Related Groups system (G-DRG system), whereby each inpatient  
97 case of treatment is remunerated by means of a corresponding DRG rate. All hospitals  
98 submit their hospitalization data to the Institute for the hospital remuneration system  
99 (Institut für das Entgeltsystem im Krankenhaus GmbH, InEK). After submission, a plausibility  
100 control of the data is carried out by InEK. The submission of hospitalization data is  
101 mandatory for reimbursement of hospital stays. This leads to a strong incentive for hospitals  
102 to supply complete data, covering virtually every hospital in Germany. The transferred data  
103 include information on age, sex, discharge type, primary and secondary ICD-10-GM(12)  
104 coded diagnosis (International Classification of Diseases, 10th Edition, German Modification  
105 Version 2020) and performed operations and procedures (Operationen- und  
106 Prozedurenschlüssel Version 2020, OPS) (13). We performed a query of G-DRG data for the  
107 year 2020 via the InEK data portal (<https://datenbrowser.inek.org/>). The InEK data are

108 available in aggregated form, so that differentiation by federal state is not possible.  
109 Differentiation by age can only be made in the predefined age groups and differentiation by  
110 gender only indirectly. The G-DRG data provided by InEK have been described in detail  
111 elsewhere (14).

## 112 Cohort selection

113 We included hospitalizations with a secondary diagnosis of RT-PCR proven COVID-19  
114 infection (ICD-10-GM: U07.1), aged over 15 years. We excluded hospitalizations 15.525  
115 (9,1%) with hospital transfer and unknown discharge status from our analysis. We identified  
116 hospitalizations with acute kidney injury by their corresponding ICD-10-GM codes (S1  
117 Table). We included hospitalizations with acute kidney injury stages 1 to 3 (AKIN 1 to 3) (15).  
118 We further searched for OPS codes indicating hemodialysis and mechanical ventilation (S1  
119 Table). The survival status at the end of each hospitalization was obtained by discharge  
120 type. The observation period was from 01.02.2020 throughout 31.12.2020.

## 121 Statistical analysis

122 We calculated crude, age-specific and age-standardized hospitalization rates (ASR) per  
123 100.000 person years and the respective 95% confidence intervals (95% CI). We used the  
124 standard population of Germany in 2011 (16), provided by the Federal Bureau of Statistics  
125 (DESTATIS), for direct age-standardization (S2 Table). We further calculated standardized  
126 rate ratios (SRR), with their respective confidence intervals. Continuous variables are  
127 reported with standard deviation (SD). Categorical data is reported in absolute numbers and  
128 percentages. We used the ICD-10 version of the Elixhauser comorbidity index (ECI) to assess  
129 comorbidities (17). We excluded acute kidney injury as a comorbidity. All data analysis was

130 carried out using R (Version 3.6.3) (18), for direct age-standardization the epitools package

131 (19) was used, contingency tables were evaluated using the epiR package(20).

## 132 Results

### 133 General characteristics and age-standardized rates

134 In 2020, there were 16.776.845 hospitalizations in German hospitals. We detected 154.170  
135 hospitalizations with RT-PCR proven COVID-19 diagnosis throughout the observation period.  
136 There were 79.781 (51,8%) male and 74.382 (48,2%) female patients hospitalized,  
137 respectively (Table 1). In 29.329 (19,0%) of the COVID-19 associated hospitalizations the  
138 treatment included an intensive care unit (ICU) stay. The age-standardized hospitalization  
139 rate for COVID-19 in Germany was 232,8 per 100.000 person years (95% CI 213,6-233,9) in  
140 2020. Most hospitalizations (1394,1 per 100.000 person years) occurred in the age group of  
141 80 years and older (Fig 1).

142

143

144

145

146

147

148

149

150



|                                      | AKI           |      | ICU           |      | Overall       |       |
|--------------------------------------|---------------|------|---------------|------|---------------|-------|
| N                                    | 16.773        |      | 29.329        |      | 154.170       |       |
| Gender                               | %             | n    | %             | n    | %             | n     |
| male                                 | 61,5 (10.308) |      | 62,6 (18.361) |      | 51,8 (79.781) |       |
| female                               | 38,5 (6.463)  |      | 37,4 (10.965) |      | 48,2 (74.382) |       |
| Age group (years)                    | %             | n    | %             | n    | %             | n     |
| 16-17                                | 0,0%          | 1    | 0,1%          | 38   | 0,3%          | 472   |
| 18-29                                | 0,4%          | 70   | 1,7%          | 493  | 4,0%          | 6143  |
| 30-39                                | 0,7%          | 112  | 2,8%          | 829  | 5,3%          | 8185  |
| 40-49                                | 1,9%          | 326  | 5,8%          | 1704 | 7,5%          | 11601 |
| 50-54                                | 2,6%          | 443  | 5,8%          | 1688 | 6,2%          | 9537  |
| 55-59                                | 4,5%          | 754  | 7,9%          | 2312 | 7,5%          | 11602 |
| 60-64                                | 6,8%          | 1134 | 9,6%          | 2818 | 7,7%          | 11858 |
| 65-74                                | 20,3%         | 3408 | 21,8%         | 6398 | 16,5%         | 25418 |
| 75-79                                | 17,0%         | 2851 | 14,6%         | 4282 | 11,7%         | 18045 |
| 80+                                  | 45,8%         | 7674 | 29,9%         | 8767 | 33,3%         | 51309 |
| length of stay (days, SD)            | 18,4 (16,9)   |      | 18,3 (16,7)   |      | 11,3 (11,9)   |       |
| Elixhauser comorbidity index (% , n) | %             | n    | %             | n    | %             | n     |
| 0                                    | 60 (10.041)   |      | 65 (18.918)   |      | 65 (99.783)   |       |
| 1-4                                  | 24 (4.029)    |      | 25 (7.186)    |      | 25 (39.117)   |       |
| >=5                                  | 16 (2.703)    |      | 10 (3.225)    |      | 10 (15.270)   |       |
| mean (SD)                            | 2,0 (3,8)     |      | 1,6 (3,8)     |      | 1,2 (3,1)     |       |

151 Table 1. General characteristics of COVID-19 hospitalizations in Germany 2020.

152 ICU: intensive care unit - hospitalizations with intensive care treatment during the hospital

153 stay, AKI: acute kidney injury - hospitalizations with acute kidney injury (Acute kidney injury

154 network Stage 1-3), SD: standard deviation

155

156 Fig 1. Age-specific rates of COVID-19 hospitalizations in Germany 2020 (per 100.000 person  
157 years)

## 158 Hospital incidence of acute kidney injury

159 Acute kidney injury, including AKI Stages 1-3, was diagnosed in 16.773 (10,9%) of the  
160 hospitalized cases with COVID-19. The ASR for AKI was 25.8 (95%CI 25.4-26.2) per 100.000  
161 person years (Table 2). While men and women were equally distributed among those  
162 hospitalized for COVID-19, men were more affected by AKI than women. The relative risk of  
163 AKI for males was 1,49 (95%CI 1,44-1,53) compared to females hospitalized with COVID-19  
164 (S2 Table). We determined 10.310 (61,5%) male and 6.463 (38,5%) female hospitalizations  
165 with acute kidney injury, respectively (Table 1). The proportion of the severity of acute  
166 kidney injury was distributed as follows: 32,0% (n= 5.407) developed AKI Stage 1, AKI Stage  
167 2 was present in 27,4 % (n= 4.625) and in 40,6% (n= 6.842) AKI Stage 3 was coded. There  
168 were 101 hospitalizations with more than one code for AKI. When acute kidney injury was  
169 present during hospital stay, 8.374 (49,9 %) needed intensive care. Furthermore, mechanical  
170 ventilation was required in 7.050 (42,0 %) hospitalizations with acute kidney injury (Table 2).  
171 The relative risk for hospitalizations with AKI to be treated in an intensive care unit was 3,27  
172 (95%CI 3,21-3,34) (Table 3).

|                                                         | AKI              |       | ICU              |       | Overall             |       |
|---------------------------------------------------------|------------------|-------|------------------|-------|---------------------|-------|
|                                                         | n                | %     | n                | %     | n                   | %     |
| <b>Overall</b>                                          | 16.773 (10,9%)   |       | 29.329 (19,0%)   |       | 154.170 (-)         |       |
| <b>Renal replacement therapy</b>                        | 3.443 (20,5%)    |       | 3.046 (10,4%)    |       | -                   |       |
| <b>males</b>                                            | 2.635            | 76,5% | 2.335            | 76,7% | -                   | -     |
| <b>females</b>                                          | 808              | 23,5% | 711              | 23,3% | -                   | -     |
| <b>In-hospital mortality</b>                            | 9.717 (57,9%)    |       | 12.322 (40,6%)   |       | 30.300 (19,7%)      |       |
| <b>males</b>                                            | 6.283            | 64,7% | 7.990            | 64,8% | 17.635              | 58,2% |
| <b>females</b>                                          | 3.434            | 35,3% | 4.330            | 35,2% | 12.665              | 41,8% |
| <b>AKI Stages</b>                                       |                  |       |                  |       |                     |       |
| <b>1</b>                                                | 5.407            | 32,0% | 1.865            | 20,3% | -                   |       |
| <b>2</b>                                                | 4.625            | 27,4% | 2.011            | 21,8% | -                   |       |
| <b>3</b>                                                | 6.842            | 40,6% | 5.333            | 57,9% | -                   |       |
| <b>Chronic kidney disease</b>                           | 5.524 (32,9%)    |       | 5.365 (18,3%)    |       | 23.380 (15,2%)      |       |
| <b>G3</b>                                               | 3.638            | 21,7% | 3.225            | 11,0% | 15.270              | 9,9%  |
| <b>G4</b>                                               | 1.490            | 8,9%  | 1.084            | 3,7%  | 4.535               | 2,9%  |
| <b>G5</b>                                               | 396              | 2,4%  | 1.056            | 3,6%  | 3.575               | 2,3%  |
| <b>Mechanical ventilation</b>                           | 7.050 (42,0%)    |       | 17.144 (58,5%)   |       | -                   |       |
| <b>males</b>                                            | 5.052            | 71,6% | 11.508           | 67,1% | -                   |       |
| <b>females</b>                                          | 1.998            | 28,3% | 5.634            | 32,9% | -                   |       |
| <b>Age-standardized rate (per 100.000 PYRs, 95% CI)</b> | 25,8 (25,4-26,2) |       | 44,0 (43,5-44,5) |       | 232.8 (213.6-233.9) |       |

173

174 Table 2: Results COVID-19 hospitalizations in Germany 2020,

175 ICU: intensive care unit - hospitalizations with intensive care treatment during the hospital

176 stay, AKI: acute kidney injury - hospitalizations with acute kidney injury (acute kidney injury

177 network, Stage 1-3), 95%CI: 95 % confidence interval, PYRs: person years

178

179

180

|         | ICU      |       | Non-ICU |       | Overall |
|---------|----------|-------|---------|-------|---------|
|         | N        | %     | N       | %     | n       |
| AKI     | 8.374    | 49,9  | 8.399   | 50,1  | 16.773  |
| Non-AKI | 20.955   | 15,3% | 116.442 | 84,7% | 137.397 |
| Overall | 29.329   | 19,0% | 124.841 | 81,0% | 154.170 |
|         | Deceased |       | Alive   |       | Overall |
|         | N        | %     | N       | %     | N       |
| AKI     | 9.717    | 57,9% | 7.056   | 42,1% | 16.773  |
| Non-AKI | 20.583   | 15,0% | 116.814 | 85,0% | 137.397 |
| Overall | 30.300   | 19,7% | 123.870 | 80,3% | 154.170 |

181

182 Table 3: Contingency table for AKI and risk of ICU admission or in-hospital mortality,  
183 ICU: intensive care unit - hospitalizations with intensive care treatment during the hospital  
184 stay, AKI: acute kidney injury - hospitalizations with acute kidney injury (acute kidney injury  
185 network, Stage 1-3)

## 186 Renal replacement therapy

187 When acute kidney injury was present, renal replacement therapy (RRT) was performed in  
188 3.443 hospitalizations, 20,5% of hospitalizations with AKI and 2,2% of all COVID-19  
189 associated hospitalizations. Furthermore, when RRT was conducted, mechanical ventilation  
190 was needed in 2.380 (69,1%) cases. The modality of renal replacement therapy was  
191 intermittent RRT in 230 (6,7%), and continuous or prolonged intermittent RRT in 3.213  
192 (93,3%) hospitalizations, respectively. In 828 (24,0%) hospitalizations more than one  
193 procedure code indicating RRT was present.

194 Chronic kidney disease (CKD Stages 3 to 5) was present in 23.380 (15.2%) hospitalizations  
195 with AKI. We observed 3.638 (21,7%) hospitalizations with AKI and CKD Stage G3, in 1.490  
196 (8.9%) hospitalizations CKD G4 was prevalent and 396 (2,4%) had CKD G5, respectively.

## 197 In-hospital mortality

198

199 For all hospitalizations with COVID-19, the in-hospital mortality amounted to 19,7% (n=  
200 30.300). Of these, 58,2% (n= 17.635) were men and 41,8% (n=12.665) were women (Table  
201 2), respectively. The relative risk for in-hospital mortality for men amounted to 1,30 (95%CI  
202 1,27-1,33) compared to women (S3 Table). The ASR for in-hospital mortality was 47,7  
203 (95%CI 47,2-48,3) per 100.000 person years. Most deaths (511,2 per 100.000 person years)  
204 were observed in the age group over 80 years of age (Fig S1). When AKI was present, 9.717  
205 died, accounting for 57,9% of deaths in this group (Table 2), the relative risk for in-hospital  
206 mortality was 3,87 (95%CI 3,80-3,94) when AKI occurred (Table 3). Moreover, when  
207 hemodialysis was performed, 2.891 died, which amounts to 61,4% of all hospitalizations  
208 with RRT.

209

## 210 Length of stay

211 The mean length of stay (LOS) for hospitalizations with COVID-19 was 11,3 days (SD 11,9).

212 When acute kidney injury was coded, the LOS increased to 18,4 days (SD 16,9). For cases

213 that had an ICU stay the mean LOS was 18,3 days (SD 16,7) (Table 1).

## 214 Time course of hospitalization rates and in-hospital mortality

215

216 The age-standardized hospitalization rates for COVID-19 took a bimodal course during the

217 observation period. The first peak of ASR occurred in April 2020 (23,95 per 100.000 person

218 years (95%CI 23,58-24,33)), after the ASR rose steadily beginning in February. Subsequently,

219 ASR for COVID-19 hospitalizations peaked again in November 2020 (72,82 per 100.000

220 person years (95%CI 72,17-73,48)). In comparison to the first peak, ASR rose steadily for two

221 months before reaching the highest rates (Fig 2A).

222 The ASR for AKI and AKI-related mortality took a flatter curve, but overall follow a similar

223 bimodal course. The ASR for AKI and AKI-related mortality reached their peak in March 2020

224 (for AKI 3,4 per 100.000 person years (95%CI 3,27-3,55), which was also when AKI-related

225 mortality reached 2,07 (95%CI 1,96-2,18), respectively). In November 2020 ASR tipped again

226 when ASR for AKI stood at 8,07 per 100.000 person years (95%CI 7,85-8,29), and the ASR for

227 AKI-related mortality rose to 4,65 (95%CI 4,49-4,82)) (Fig 2A).

228 The standardized rate ratios (SRR) for AKI and AKI-related mortality with the overall ASR for

229 COVID-19 hospitalizations in the denominator, actually decreased throughout the

230 observation period (Fig 2B) and remained lower in autumn than they were in spring. In

231 contrast to this finding, the ASR and in particular the SRR for overall mortality in COVID-19  
232 hospitalizations rose sharply again as early as September 2020 (Fig 3A and 3B).

233 The distribution of age groups varied throughout the observation period. In particular, the  
234 age group of 80 years and above were most prevalent in the months of April, November and  
235 December (Fig S4). Hospitalizations in which AKI was coded, were proportionately much  
236 older, with the 80 years and above age group being the most represented (Fig S5).

237 Fig 2: A) Time course of age-standardized rates (per 100.00 person years) of overall  
238 hospitalization, AKI and AKI-related mortality for COVID-19 in Germany (2020); B)  
239 Standardized rate ratios (SRR) of AKI age-standardized rates (per 100.00 person years) and  
240 AKI-related mortality in relation to the overall age-standardized COVID-19 hospitalization  
241 rate in Germany (2020)

242 Fig 3: A) Time course of age-standardized rates (per 100.00 person years) of overall  
243 hospitalization and overall mortality for COVID-19 in Germany (2020); B) Standardized rate  
244 ratios (SRR) of overall mortality age-standardized rates (per 100.00 person years) in relation  
245 to the overall age-standardized COVID-19 hospitalization rate in Germany (2020)

## 246 Comorbidities

247 The Elixhauser comorbidity index (ECI) varied among the different groups. The mean ECI for  
248 all COVID-19 associated hospitalizations was 1,2 (SD 3,1). For hospitalizations requiring  
249 intensive care the mean ECI was 1,6 (SD 3,8). When acute kidney injury was present the ECI  
250 increased to 2,0 (SD 3,8). In general, the four most common coded comorbidities were  
251 uncomplicated hypertension (35,3%), fluid and electrolyte disorders (20,6%), uncomplicated  
252 diabetes mellitus (13,3%) and cardiac arrhythmias (10,0%) (Fig 4). When acute kidney injury



253 or an ICU stay were coded, cardiac arrhythmias were relatively more prevalent compared to  
254 all hospitalizations with COVID-19 (Fig S2, S3).

255 Fig 4: Relative frequencies of comorbidities in COVID-19 hospitalizations in Germany 2020.

256 chf: congestive heart failure; carit: cardiac arrhythmias; valv: valvular disease; pcd: pulmonary circulation  
257 disorders; pvd: peripheral vascular disorders; hypunc: hypertension - uncomplicated; hypc: hypertension  
258 - complicated; para: paralysis; ond: other neurological disorders; cpd: chronic pulmonary disease;  
259 diabunc: diabetes -uncomplicated; diabc: diabetes- complicated; hypothy: hypothyroidism; ld: liver  
260 disease; pud: peptic ulcer disease- excluding bleeding; aids: AIDS/HIV; lymph: lymphoma; metacanc:  
261 metastatic cancer; solidtum: solid tumour: without metastasis; rheumd: rheumatoid arthritis/collaged  
262 vascular disease; coag: coagulopathy; obes: obesity; wloss: weight loss; fed: fluid and electrolyte  
263 disorders; blane: blood loss anaemia; dane: deficiency anaemia; alcohol: alcohol abuse; drug: drug abuse;  
264 psycho: psychoses; depre: depression;  
265

## 266 Discussion

267 Our study for the first time provides nationwide data on COVID-19 hospitalizations and  
268 acute kidney injury in Germany in 2020. The key findings that emerge from our data are as  
269 follows. The highest proportion of hospitalizations associated with COVID-19 were in the  
270 age group over 80 years. The gender distribution was equal in COVID-19 related  
271 hospitalization, however, we observed that men more often developed acute kidney injury  
272 (RR 1,49 (95%CI 1,44-1,53)), needed ICU care and had a higher risk of in-hospital mortality  
273 (RR: 1,30 (95%CI 1,27-1,33)) than women. Our results thus exhibit a gender bias. This is  
274 consistent with a meta-analysis including 3.111.714 COVID-19 associated hospitalizations  
275 worldwide, which identified male sex as a risk factor for death and ICU-admission, despite  
276 the gender ratio being equal at the time of admission (21). Different underlying  
277 mechanisms - from hormonal, genetic to behavioral effects and risk factor prevalence -  
278 have been discussed in the literature (21,22).

279 Overall, 19 % of all hospitalizations needed intensive care treatment. This fraction was  
280 particularly high in patients with acute kidney injury. This finding is in line with other studies  
281 (23,24). There are no clearly defined criteria for ICU admission in COVID-19 hospitalized  
282 patients. Germany possesses the highest capacity of intensive care beds in all OECD-  
283 countries. Despite the presumably higher availability of ICU capacity, this fact did not lead to  
284 higher utilization of these capacities. This could be an indicator that the percentage of  
285 critically ill patients was similar compared to different countries (23).

286 Occurrence of AKI considerably differs in previous studies, partly due to a different  
287 definition of AKI. Our analysis showed that 10.9% of all hospitalizations experienced acute  
288 kidney injury. The incidence of AKI in this national series is lower than what has been  
289 reported in regionally confined studies from the United States (8,9,23). A meta-analysis by  
290 Gabarre et al. (2) rendered similar results to our figures. They observed an average AKI  
291 incidence of 11% (95%CI 8–17%) overall, with highest ranges in the critically ill (23% (95%CI  
292 14–35%)). Nevertheless, the age structure, risk factor prevalence and the burden of COVID-  
293 19 during the observation period differ relevantly between countries and the AKI rate is  
294 therefore only comparable to a limited extend.

295 A large proportion of patients with acute kidney injury suffered severe kidney injury (AKIN  
296 Stage 3: 40,6%), this is consistent with previous findings (9). In the group of hospitalization  
297 with AKI 49,9% required ICU admission compared to 15,2 % of patients without AKI. The  
298 relative risk to be treated in an ICU was 3,27 for AKI patients. Moreover, in the group with  
299 AKI, 42,0 % required mechanical ventilation. Data from the early phase of the pandemic in  
300 New York state estimated that 53,6% of AKI patients needed invasive ventilation (10). This  
301 higher numbers are likely reflective of more severe disease outcomes in patients with AKI.

302 RRT was required in 2,2% of all hospitalizations. Among patients with AKI 20,5% required  
303 RRT. This figure is consistent with data from various studies (6,9,25). The majority (88,5%) of  
304 the RRT was performed in the intensive care unit. 69,1 % of all patients requiring dialysis  
305 needed invasive ventilation. Similar findings were reported in a multi-center cohort study  
306 from the United States (6). Previous studies suggested that there is an association between  
307 mechanical ventilation, AKI and RRT. RRT often occurs around time of intubation, suggesting  
308 a role for altered hemodynamics in this situation (6,10). Hence, vasopressors are often  
309 initiated around this time.

310 The overall in-hospital mortality for COVID-19 associated hospitalizations vary across  
311 different countries and cohorts, showing differences in testing and case identification,  
312 variable thresholds for hospitalization and staff capacities. Therefore, differences in in-  
313 hospital mortality ranged between 15 to 20% (26,27). Our analysis showed that 30.300  
314 (19.7%) of hospitalizations with COVID-19 ultimately deceased, of 154.170 initially admitted  
315 to hospital. In-hospital mortality was 57.9% among patients with AKI versus 15% among  
316 those without AKI. This finding underlines the poor prognosis of these patients and the  
317 severity of disease.

318 The age-standardized hospitalization rate due to COVID-19 in 2020 was bimodally shaped,  
319 with peak rates in April and November. This observation is congruent with the incidence  
320 figures reported by the Robert Koch Institute (28). The first peak with increasing mortality  
321 rates in March and April was followed by a decline in mortality rates and a concomitant  
322 decrease in hospital admissions. Similar results have already been demonstrated in various  
323 studies from other countries. In a data-analysis from the United States a decrease in the  
324 risk-adjusted mortality was observed, ranging from 16.56 % to 9.29% in the early period of

325 this study (January through April 2020) compared with the later period (May through June  
326 2020) (29). Further, national ICU data from the United Kingdom – published as a preprint up  
327 to now - confirmed this finding. The authors found a reduction in mortality rates from 41,4%  
328 in March 2020 to 24,8% in June 2020 (30). The underlying reason for the decrease of  
329 mortality rates is not obvious and certainly multifactorial. One important factor was  
330 certainly the concomitant decline in the incidence rate in the UK and the US. For example, a  
331 large US study of health insurance data, involving more than 38.517 patients, revealed that  
332 the strongest determinant of improvements in in-hospital outcome was a decline in  
333 community rates of infection (29). Other reasons might be a shift in demographics,  
334 experience in physicians to early diagnose and treat COVID-19 patients, hospitals and staff  
335 became less overwhelmed during time. In our data during the second peak in COVID-19  
336 hospitalizations, which was more pronounced than the first, the in-hospital mortality rate  
337 increased steadily from September to December and exceeded the COVID-19 associated in-  
338 hospital mortality in March and April markedly (5,36 per 100.000 person years in April and  
339 16,15 per 100.000 person years in December). One can only speculate about the factors that  
340 led to this development. One, but certainly not the only, explanation could be a different  
341 age distribution of patients admitted to the hospital with a higher proportion of older  
342 patients in November and December, as in our data (Fig S4, Fig S5). Further, multiple factors  
343 might have influenced in-hospital mortality. The increasing number of patients in need of  
344 critical care could have overwhelmed hospitals regionally, which happened for example in  
345 Saxony, Germany in December 2020. As already mentioned, an American study has shown  
346 that hospitals did better when the prevalence of COVID-19 in their surrounding  
347 communities was lower(29). Another contributing factor could have been staff shortages  
348 driven by COVID-19 infections, school lockdowns, quarantine regulations and the necessity

349 to take care of relatives infected with COVID-19 or in quarantine. In contrast to the  
350 development discussed above, the ASR for AKI and AKI-related mortality had a  
351 disproportionately smaller increase and were already declining in December. The age  
352 distribution in our cohort was similar among all hospitalized patients, with a higher  
353 proportion of elderly patients in the second peak in October, November and December in  
354 comparison to February, March and April. Thus, differences in age distribution is not a good  
355 explanation for this finding (S4 Fig and S5). At this point, it must be said again that multiple  
356 factors could have influenced the ASR for AKI und AKI-related mortality. Apart from  
357 differences in the patient population or age distribution, changes in the treatment strategy -  
358 e.g., the early use of drug therapies for patients with an increased risk of severe COVID-19  
359 courses.

360 The mean length of stay (LOS- discharged or dead) of all patients was 11,3 days and  
361 increased with AKI to 18,4 days. LOS varies in different studies, and - according to a  
362 systematic review by Rees et al. (31) - the median LOS was 14 days in China, compared with  
363 5 (IQR 3–9) days outside of China. Similar figures were reported by Fisher et al. (8). This may  
364 be explained by many differences in criteria for admission and discharge between countries,  
365 and different timings in the course of the pandemic. Hospital capacities in Germany were  
366 not overwhelmed by the pandemic, and the pressure to discharge patients might have been  
367 lower. The most comprehensive analysis of German patients to date included 10.021  
368 patients with a mean LOS of 14,3 days (32). This was longer than in our analysis, an  
369 explanation for the discrepancy could be timing of data collection. Karagiannidis et al.  
370 collected their data at the beginning of the pandemic. Due to an increasing experience in

371 treating COVID-19 patients and new treatment options, the length of stay consequently  
372 declined.

373 The observed comorbidities varied between the different groups. Hypertension, diabetes  
374 mellitus, fluid and electrolyte disorders and cardiac arrhythmias were the most commonly  
375 coded comorbidities. This finding is plausible, as these are the most common comorbidities  
376 in patients with chronic kidney disease (33) and likewise known risk factors for  
377 hospitalization with COVID-19 (34). Cardiac arrhythmias became more prevalent in  
378 hospitalizations with AKI. Cardiac arrhythmias are a common finding in COVID-19, in  
379 particular with an increasing number of comorbidities (35).

#### 380 [Strengths and limitations](#)

381 The major strength of this study is that we provide a nationwide population-based view on  
382 COVID-19 hospitalizations with acute kidney injury in Germany. We retrieved DRG-data  
383 covering virtually every hospital in Germany. In this study, we use routine hospitalization  
384 data, which is lacking clinical detail. This might lead to confounding that we could not adjust  
385 for. The InEK provides aggregated data due to data safety precautions, which is fully  
386 anonymized. It is, therefore, possible that this could lead to bias caused by readmission,  
387 though this possibility is limited, because of the severity of most cases and our efforts to  
388 exclude readmissions from the dataset. Another important fact to consider, when analyzing  
389 routine data, is the observation period. In our analysis the observation period ends in the  
390 midst of the second wave of the COVID-19 pandemic in Germany. This will lead to bias, as  
391 the outcome of these cases remains unknown, in particular for hospitalizations in the last  
392 month of the observation period.

393



395 Bibliography

- 396 1. Richardson S, Hirsch JS, Narasimhan M, Crawford JM, McGinn T, Davidson KW, et al.  
397 Presenting Characteristics, Comorbidities, and Outcomes among 5700 Patients  
398 Hospitalized with COVID-19 in the New York City Area. *JAMA - Journal of the*  
399 *American Medical Association*. 2020;323(20):2052–9.
- 400 2. Gabarre P, Dumas G, Dupont T, Darmon M, Azoulay E, Zafrani L. Acute kidney injury  
401 in critically ill patients with COVID-19. *Intensive Care Medicine* [Internet].  
402 2020;46(7):1339–48. Available from: <https://doi.org/10.1007/s00134-020-06153-9>
- 403 3. Wang L, Li X, Chen H, Yan S, Li D, Li Y, et al. Coronavirus disease 19 infection does not  
404 result in acute kidney injury: An analysis of 116 hospitalized patients from Wuhan,  
405 China. *American Journal of Nephrology*. 2020;51(5):343–8.
- 406 4. Yang X, Jin Y, Li R, Zhang Z, Sun R, Chen D. Prevalence and impact of acute renal  
407 impairment on COVID-19: A systematic review and meta-analysis. *Critical Care*.  
408 2020;24(1):1–8.
- 409 5. Zhou F, Yu T, Du R, Fan G, Liu Y, Liu Z, et al. Clinical course and risk factors for  
410 mortality of adult inpatients with COVID-19 in Wuhan, China: a retrospective cohort  
411 study. *The Lancet* [Internet]. 2020;395(10229):1054–62. Available from:  
412 [http://dx.doi.org/10.1016/S0140-6736\(20\)30566-3](http://dx.doi.org/10.1016/S0140-6736(20)30566-3)
- 413 6. Gupta S, Coca SG, Chan L, Melamed ML, Brenner SK, Hayek SS, et al. AKI treated with  
414 renal replacement therapy in critically ill patients with COVID-19. *Journal of the*  
415 *American Society of Nephrology*. 2021;32(1):161–76.
- 416 7. Thakkar J, Chand S, Aboodi MS, Gone AR, Alahiri E, Schechter DE, et al. Characteristics,  
417 Outcomes and 60-Day Hospital Mortality of ICU Patients with COVID-19 and Acute  
418 Kidney Injury. *Kidney360*. 2020;1(12):1339–44.



- 419 8. Fisher M, Neugarten J, Bellin E, Yunes M, Stahl L, Johns TS, et al. AKI in Hospitalized  
420 Patients with and without COVID-19: A Comparison Study. *Journal of the American*  
421 *Society of Nephrology* [Internet]. 2020 Sep 1;31(9):2145 LP – 2157. Available from:  
422 <http://jasn.asnjournals.org/content/31/9/2145.abstract>
- 423 9. Chan L, Chaudhary K, Saha A, Chauhan K, Vaid A, Zhao S, et al. AKI in hospitalized  
424 patients with COVID-19. *Journal of the American Society of Nephrology*.  
425 2021;32(1):151–60.
- 426 10. Hirsch JS, Ng JH, Ross DW, Sharma P, Shah HH, Barnett RL, et al. Acute kidney injury  
427 in patients hospitalized with COVID-19. *Kidney International*. 2020;98(1):209–18.
- 428 11. Karagiannidis C, Mostert C, Hentschker C, Voshaar T, Malzahn J, Schillinger G, et al.  
429 Case characteristics, resource use, and outcomes of 10<sup>21</sup> patients with COVID-19  
430 admitted to 920 German hospitals: an observational study. *The Lancet Respiratory*  
431 *Medicine* [Internet]. 2020 [cited 2021 Mar 11];8(9):853–62. Available from:  
432 [www.thelancet.com/respiratoryVol](http://www.thelancet.com/respiratoryVol)
- 433 12. Graubner B, Auhuber TC. ICD-10-GM Version 2020, Systematisches Verzeichnis,  
434 Internationale statistische Klassifikation der Krankheiten und verwandter  
435 Gesundheitsprobleme, 10. Revision, Stand: 20. September 2019 [Internet]. Köln:  
436 Bundesinstitut für Arzneimittel und Medizinprodukte (BfArM) im Auftrag des  
437 Bundesministeriums für Gesundheit (BMG) unter Beteiligung der Arbeitsgruppe ICD  
438 des Kuratoriums für Fragen der Klassifikation im Gesundheitswesen (KKG); 2019. p.  
439 September 2019. Available from: [www.dimdi.de](http://www.dimdi.de) – Klassifikationen – Downloads –  
440 ICD-10-GM – Version 2021
- 441 13. Operationen- und Prozedurenschlüssel Internationale Klassifikation der Prozeduren  
442 in der Medizin (OPS) Band 1: Systematisches Verzeichnis [Internet]. Bundesinstitut für

- 443 Arzneimittel und Medizinprodukte (BfArM) im Auftrag des Bundesministeriums für  
444 Gesundheit (BMG) unter Beteiligung der Arbeitsgruppe ICD des Kuratoriums für  
445 Fragen der Klassifikation im Gesundheitswesen (KKG); 2020. 740. Available from:  
446 <https://www.dimdi.de/dynamic/de/klassifikationen/icd/icd-10-gm/>
- 447 14. Busse R, Nimptsch U. COVID-19-Pandemie: Historisch niedrige Bettenauslastung.  
448 Deutsches Aerzteblatt Online. 2021;118(10):10–3.
- 449 15. Levin A, Warnock DG, Mehta RL, Kellum JA, Shah S v., Molitoris BA, et al. Improving  
450 Outcomes From Acute Kidney Injury: Report of an Initiative. American Journal of  
451 Kidney Diseases. 2007;50(1):1–4.
- 452 16. Gesundheitsberichterstattung des Bundes [Internet]. 2021. Available from:  
453 [https://www.gbe-bund.de/gbe/pkg\\_isgbe5.prc\\_isgbe](https://www.gbe-bund.de/gbe/pkg_isgbe5.prc_isgbe)
- 454 17. Quan H, Sundararajan V, Halfon P, Fong A. Coding algorithms for defining  
455 comorbidities in. Medical Care [Internet]. 2005;43(11). Available from:  
456 [http://scholar.google.com/scholar?hl=en&btnG=Search&q=intitle:Coding+Algorithms  
457 +for+Defining+Comorbidities+in#1%5Cnhttp://scholar.google.com/scholar?hl=en&bt  
458 nG=Search&q=intitle:Coding+algorithms+for+defining+comorbidities+in#1](http://scholar.google.com/scholar?hl=en&btnG=Search&q=intitle:Coding+Algorithms+for+Defining+Comorbidities+in#1%5Cnhttp://scholar.google.com/scholar?hl=en&btnG=Search&q=intitle:Coding+algorithms+for+defining+comorbidities+in#1)
- 459 18. Team RC. R: A Language and Environment for Statistical Computing [Internet].  
460 Vienna, Austria: R Foundation for Statistical Computing; 2020. Available from: [www.r-  
461 project.org](http://www.r-project.org)
- 462 19. Tomas J. Aragon. epitools: Epidemiology Tools. R package version 0.5-10.1. 2020.
- 463 20. Stevenson M, Sergeant E. epiR - Tools for the Analysis of Epidemiological Data. 2021.
- 464 21. Peckham H, de Gruijter NM, Raine C, Radziszewska A, Ciurtin C, Wedderburn LR, et  
465 al. Male sex identified by global COVID-19 meta-analysis as a risk factor for death and

- 466 ITU admission. Nature Communications [Internet]. 2020;11(1):1–10. Available from:  
467 <http://dx.doi.org/10.1038/s41467-020-19741-6>
- 468 22. Kelada M, Anto A, Dave K, Saleh SN. The Role of Sex in the Risk of Mortality From  
469 COVID-19 Amongst Adult Patients: A Systematic Review. Cureus. 2020;12(8).
- 470 23. Richardson S, Hirsch JS, Narasimhan M, Crawford JM, McGinn T, Davidson KW, et al.  
471 Presenting Characteristics, Comorbidities, and Outcomes Among 5700 Patients  
472 Hospitalized With COVID-19 in the New York City Area. JAMA [Internet].  
473 2020;323:2052–9. Available from: <https://jamanetwork.com/>
- 474 24. Fisher M, Neugarten J, Bellin E, Yunes M, Stahl L, Johns TS, et al. AKI in Hospitalized  
475 Patients with and without COVID-19: A Comparison Study. Journal of the American  
476 Society of Nephrology [Internet]. 2020 Sep 1;31(9):2145 LP – 2157. Available from:  
477 <http://jasn.asnjournals.org/content/31/9/2145.abstract>
- 478 25. Richards-Belle A, Orzechowska I, Doidge J, Thomas K, Harrison DA, Koelewyn A, et al.  
479 Critical care outcomes, for the first 200 patients with confirmed COVID-19, in  
480 England, Wales and Northern Ireland: A report from the ICNARC Case Mix  
481 Programme. Journal of the Intensive Care Society. 2020;0(0):1–10.
- 482 26. Wiersinga WJ, Rhodes A, Cheng AC, Peacock SJ, Prescott HC. Pathophysiology,  
483 Transmission, Diagnosis, and Treatment of Coronavirus Disease 2019 (COVID-19): A  
484 Review. JAMA - Journal of the American Medical Association. 2020;324(8):782–93.
- 485 27. Sorci G, Faivre B, Morand S. Explaining among-country variation in COVID-19 case  
486 fatality rate. Scientific Reports. 2020 Dec 1;10(1).
- 487 28. Robert Koch Institut. Total overview of cases, deaths, and 7-day incidences reported  
488 per day to the RKI by state and county. [Internet]. 2021. Available from:  
489 [https://www.rki.de/DE/Content/InfAZ/N/Neuartiges\\_Coronavirus/Daten/Fallzahlen\\_](https://www.rki.de/DE/Content/InfAZ/N/Neuartiges_Coronavirus/Daten/Fallzahlen_)

- 490            Daten.html;jsessionid=4D411DFBB2E2575A9CD1F5504E7CE3BC.internet052?nn=134  
491            90888
- 492    29.        Asch DA, Sheils NE, Islam MN, Chen Y, Werner RM, Buresh J, et al. Variation in US  
493            Hospital Mortality Rates for Patients Admitted with COVID-19 during the First 6  
494            Months of the Pandemic. *JAMA Internal Medicine*. 2020;19104(4):471–8.
- 495    30.        Dennis JM, McGovern AP, Vollmer SJ, Mateen BA. Improving COVID-19 critical care  
496            mortality over time in England: A national cohort study, March to June 2020.  
497            *medRxiv*. 2020;44(0).
- 498    31.        Rees EM, Nightingale ES, Jafari Y, Waterlow NR, Clifford S, Pearson CAB, et al. COVID-  
499            19 length of hospital stay: A systematic review and data synthesis. *medRxiv*. 2020;
- 500    32.        Karagiannidis C, Mostert C, Hentschker C, Voshaar T, Malzahn J, Schillinger G, et al.  
501            Case characteristics, resource use, and outcomes of 10 021 patients with COVID-19  
502            admitted to 920 German hospitals: an observational study. *The Lancet Respiratory*  
503            *medicine* [Internet]. 2020 Sep [cited 2021 Mar 11];8(9):853–62. Available from:  
504            [www.thelancet.com/respiratoryVol](http://www.thelancet.com/respiratoryVol)
- 505    33.        Reichel H, Zee J, Tu C, Young E, Pisoni RL, Stengel B, et al. Chronic kidney disease  
506            progression and mortality risk profiles in Germany: Results from the Chronic Kidney  
507            Disease Outcomes and Practice Patterns Study. *Nephrology Dialysis Transplantation*.  
508            2020 May 1;35(5):803–10.
- 509    34.        Ioannou GN, Locke E, Green P, Berry K, O’Hare AM, Shah JA, et al. Risk Factors for  
510            Hospitalization, Mechanical Ventilation, or Death Among 107131 US Veterans With  
511            SARS-CoV-2 Infection. *JAMA network open*. 2020;3(9):e2022310.

- 512 35. Coromilas EJ, Kochav S, Goldenthal I, Biviano A, Garan H, Goldberg S, et al.  
513 Worldwide Survey of COVID-19 Associated Arrhythmias. *Circulation: Arrhythmia and*  
514 *Electrophysiology*. 2021;(March):285–95.  
515  
516

## 517 Supporting information

518 S1 Fig. Age-specific mortality rates of COVID-19 hospitalizations in Germany 2020 (per

519 100.000 person years)

520 S2 Fig. Relative frequencies of comorbidities in COVID-19 hospitalizations with AKI in

521 Germany 2020.

522 chf: congestive heart failure; carit: cardiac arrhythmias; valv: valvular disease; pcd: pulmonary circulation  
523 disorders; pvd: peripheral vascular disorders; hypunc: hypertension - uncomplicated; hypc: hypertension  
524 - complicated; para: paralysis; ond: other neurological disorders; cpd: chronic pulmonary disease;  
525 diabunc: diabetes -uncomplicated; diabc: diabetes- complicated; hypothy: hypothyroidism; ld: liver  
526 disease; pud: peptic ulcer disease- excluding bleeding; aids: AIDS/HIV; lymph: lymphoma; metacanc:  
527 metastatic cancer; solidtum: solid tumour: without metastasis; rheumd: rheumatoid arthritis/collaged  
528 vascular disease; coag: coagulopathy; obes: obesity; wloss: weight loss; fed: fluid and electrolyte  
529 disorders; blane: blood loss anaemia; dane: deficiency anaemia; alcohol: alcohol abuse; drug: drug abuse;  
530 psycho: psychoses; depre: depression;

531

532 S3 Fig. Relative frequencies of comorbidities in COVID-19 hospitalizations with ICU

533 treatment in Germany 2020.

534 chf: congestive heart failure; carit: cardiac arrhythmias; valv: valvular disease; pcd: pulmonary circulation  
535 disorders; pvd: peripheral vascular disorders; hypunc: hypertension - uncomplicated; hypc: hypertension  
536 - complicated; para: paralysis; ond: other neurological disorders; cpd: chronic pulmonary disease;  
537 diabunc: diabetes -uncomplicated; diabc: diabetes- complicated; hypothy: hypothyroidism; ld: liver  
538 disease; pud: peptic ulcer disease- excluding bleeding; aids: AIDS/HIV; lymph: lymphoma; metacanc:  
539 metastatic cancer; solidtum: solid tumour: without metastasis; rheumd: rheumatoid arthritis/collaged  
540 vascular disease; coag: coagulopathy; obes: obesity; wloss: weight loss; fed: fluid and electrolyte  
541 disorders; blane: blood loss anaemia; dane: deficiency anaemia; alcohol: alcohol abuse; drug: drug abuse;  
542 psycho: psychoses; depre: depression;

543

544 S4 Fig. Percentage distribution of age groups during the observation period (Overall COVID-

545 19)

546 S5 Fig. Percentage distribution of age groups during the observation period (AKI)

547 S1 Table. List of ICD-10-GM and OPS Codes, version 2020

548 S2 Table. Contingency table AKI by sex

549 S3 Table. Contingency table in-hospital mortality by sex

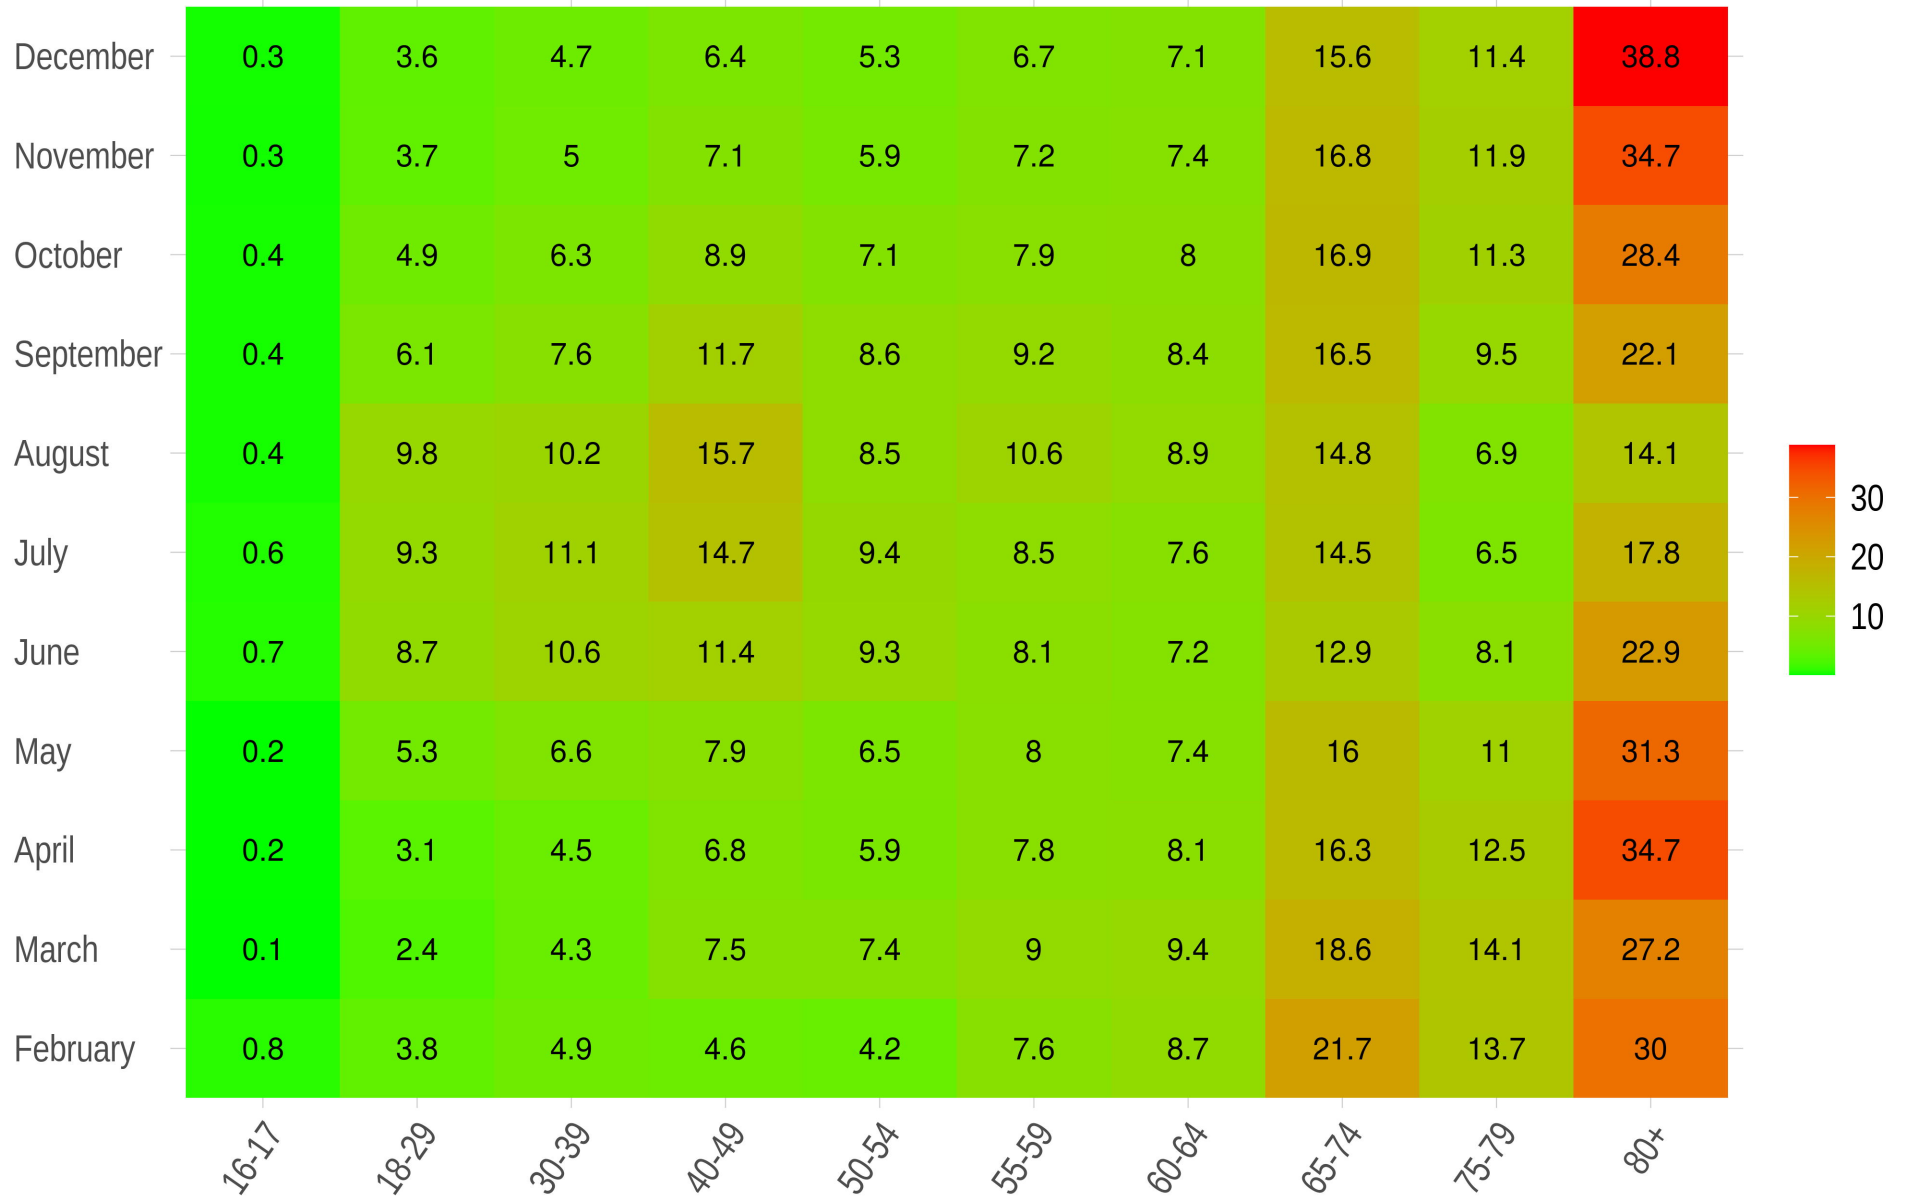



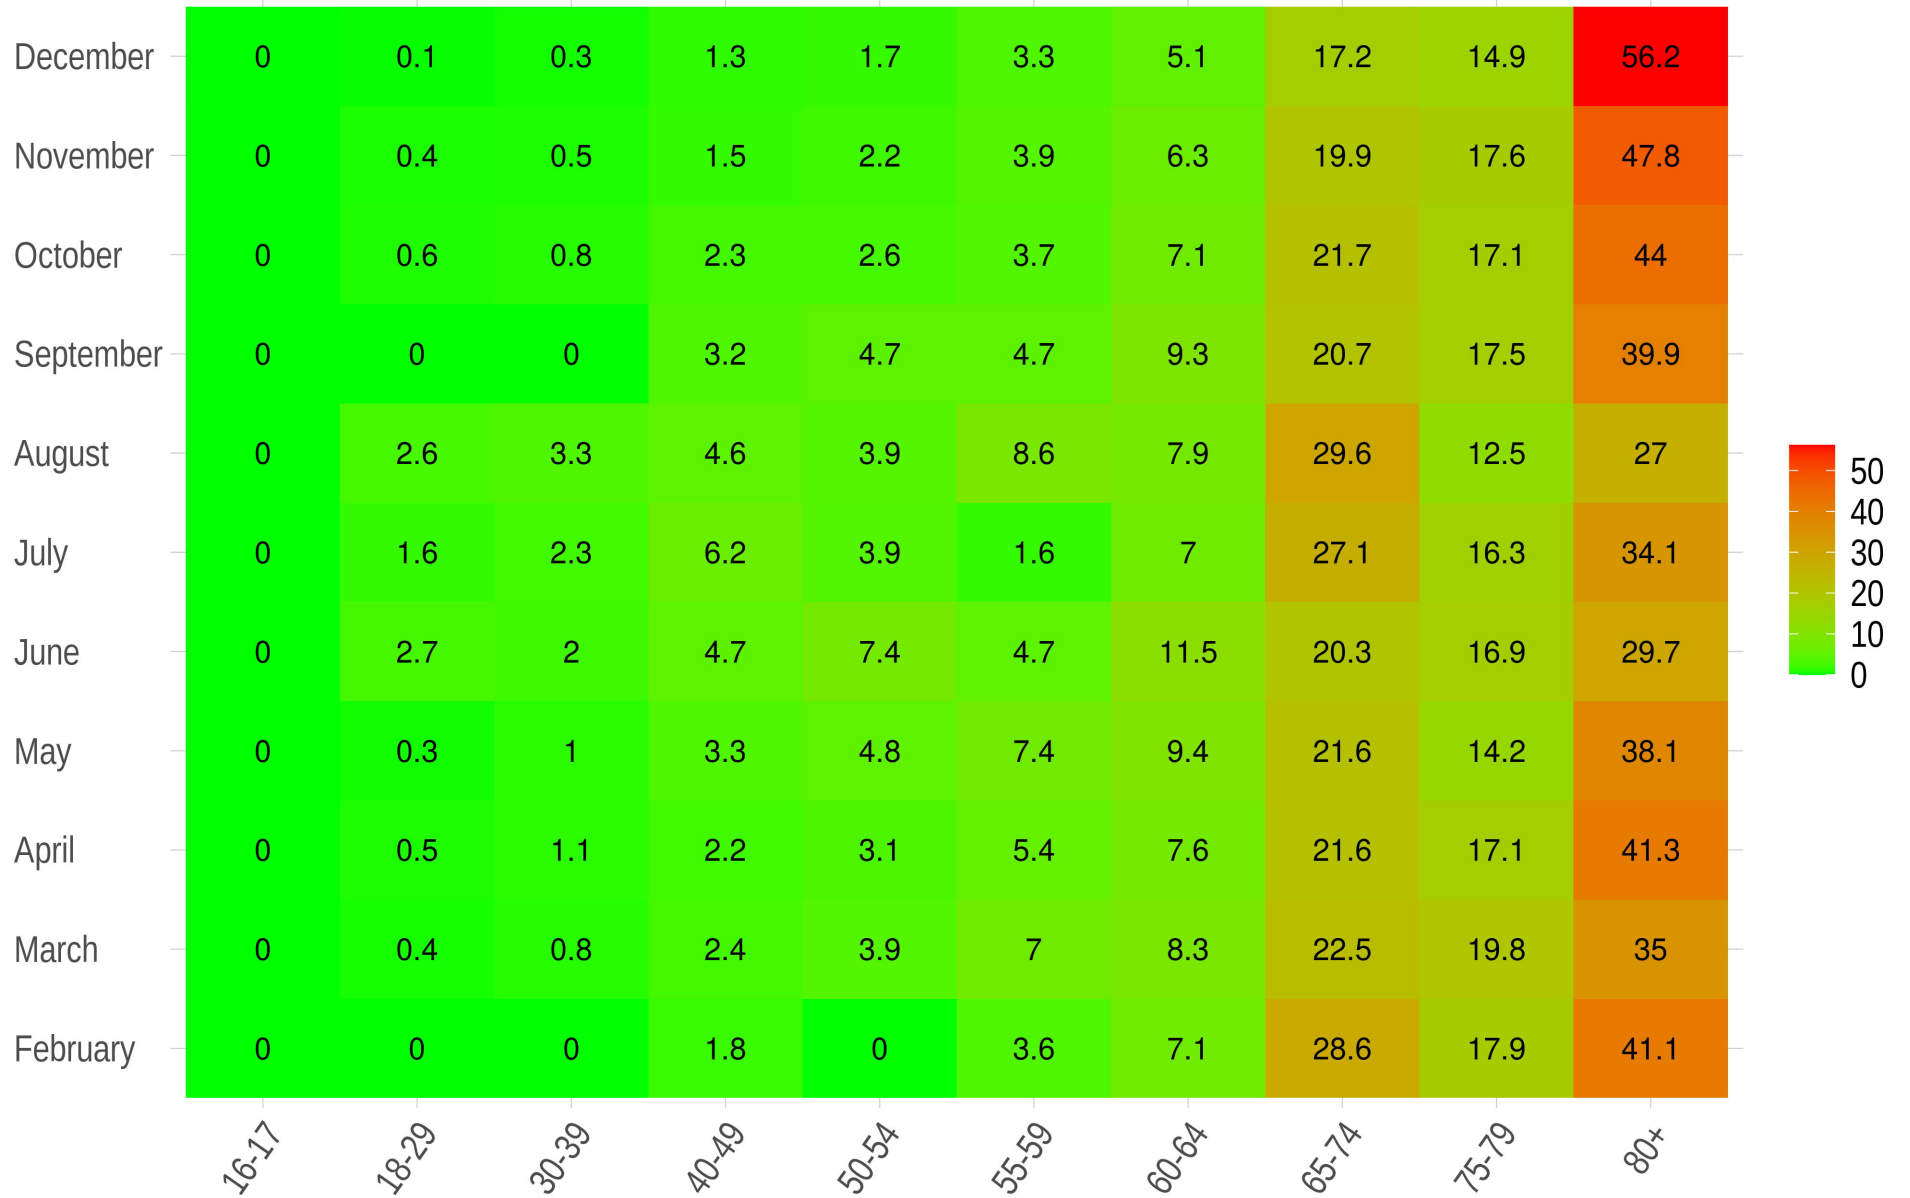

**A**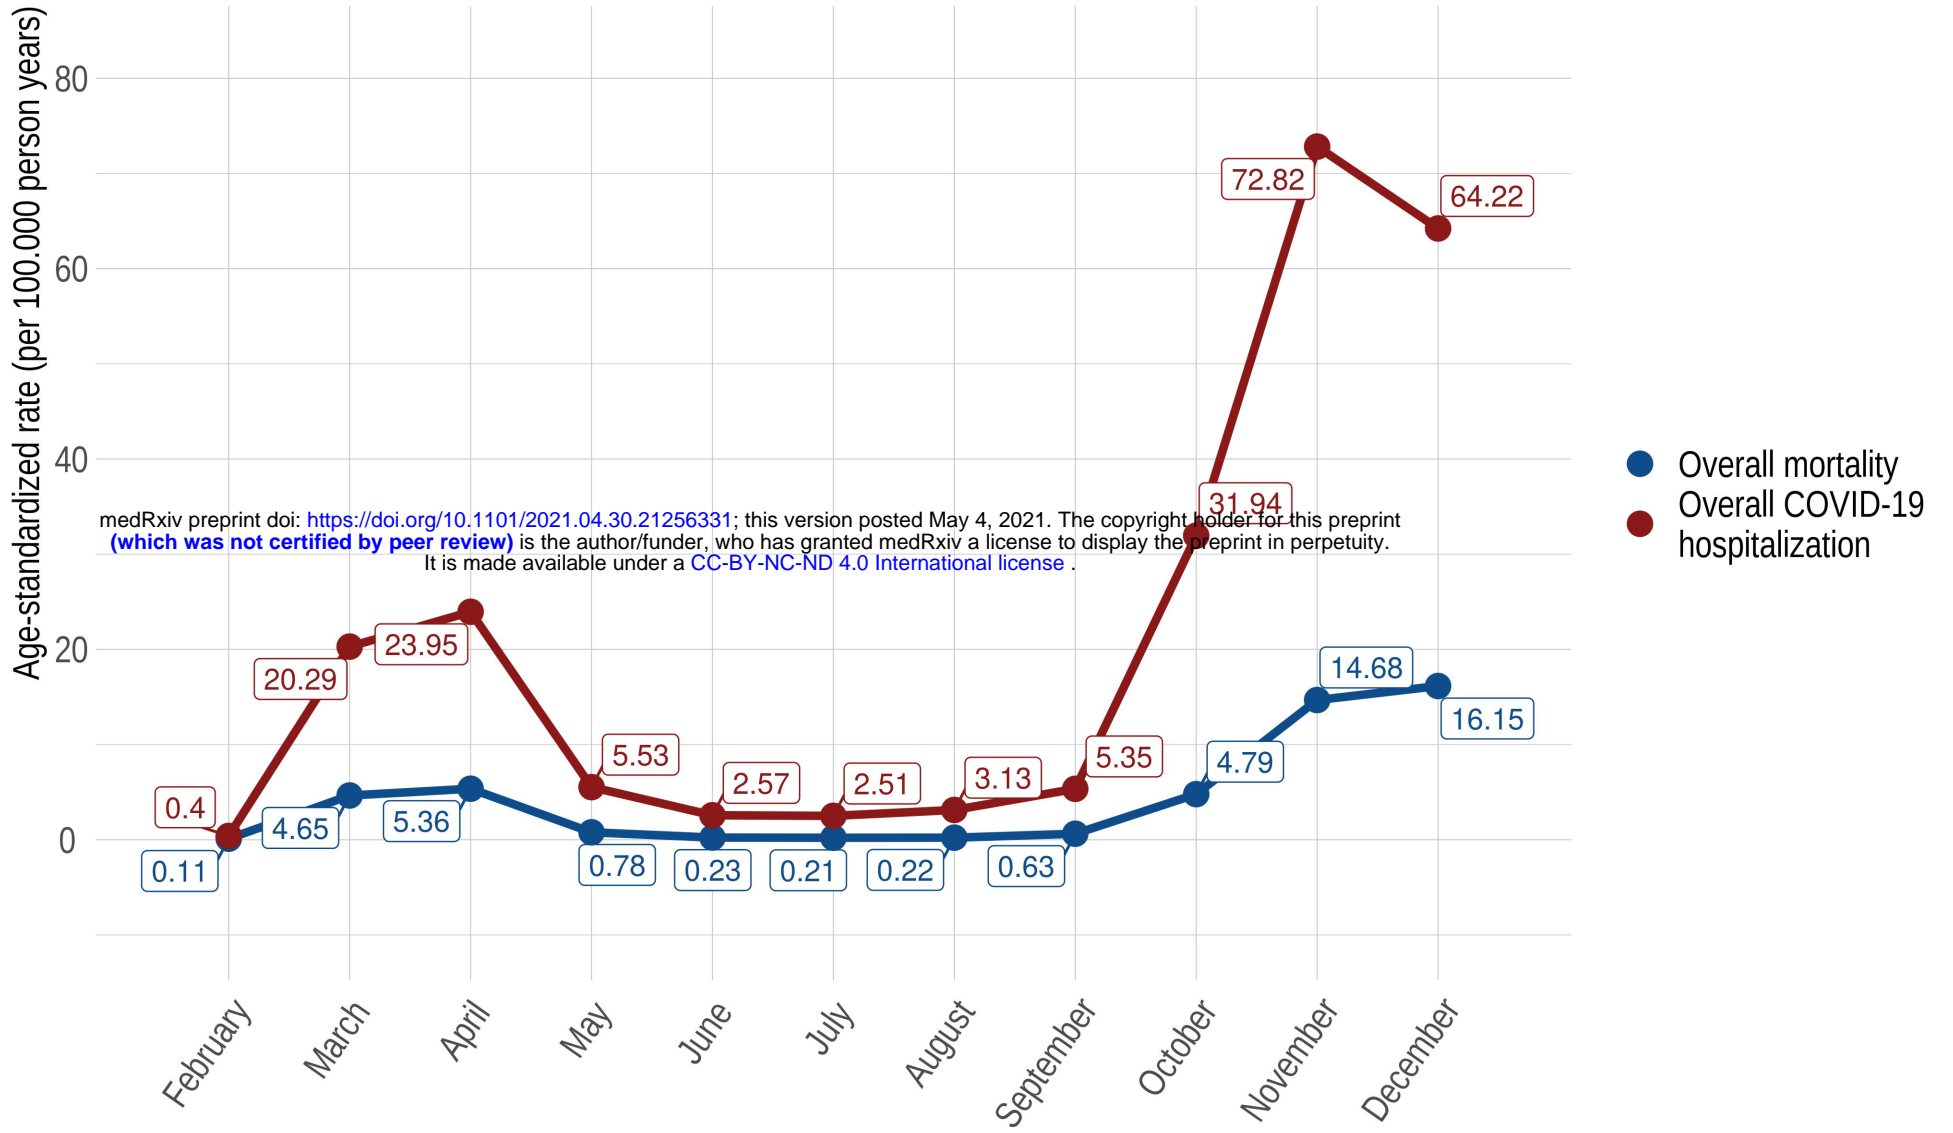**B**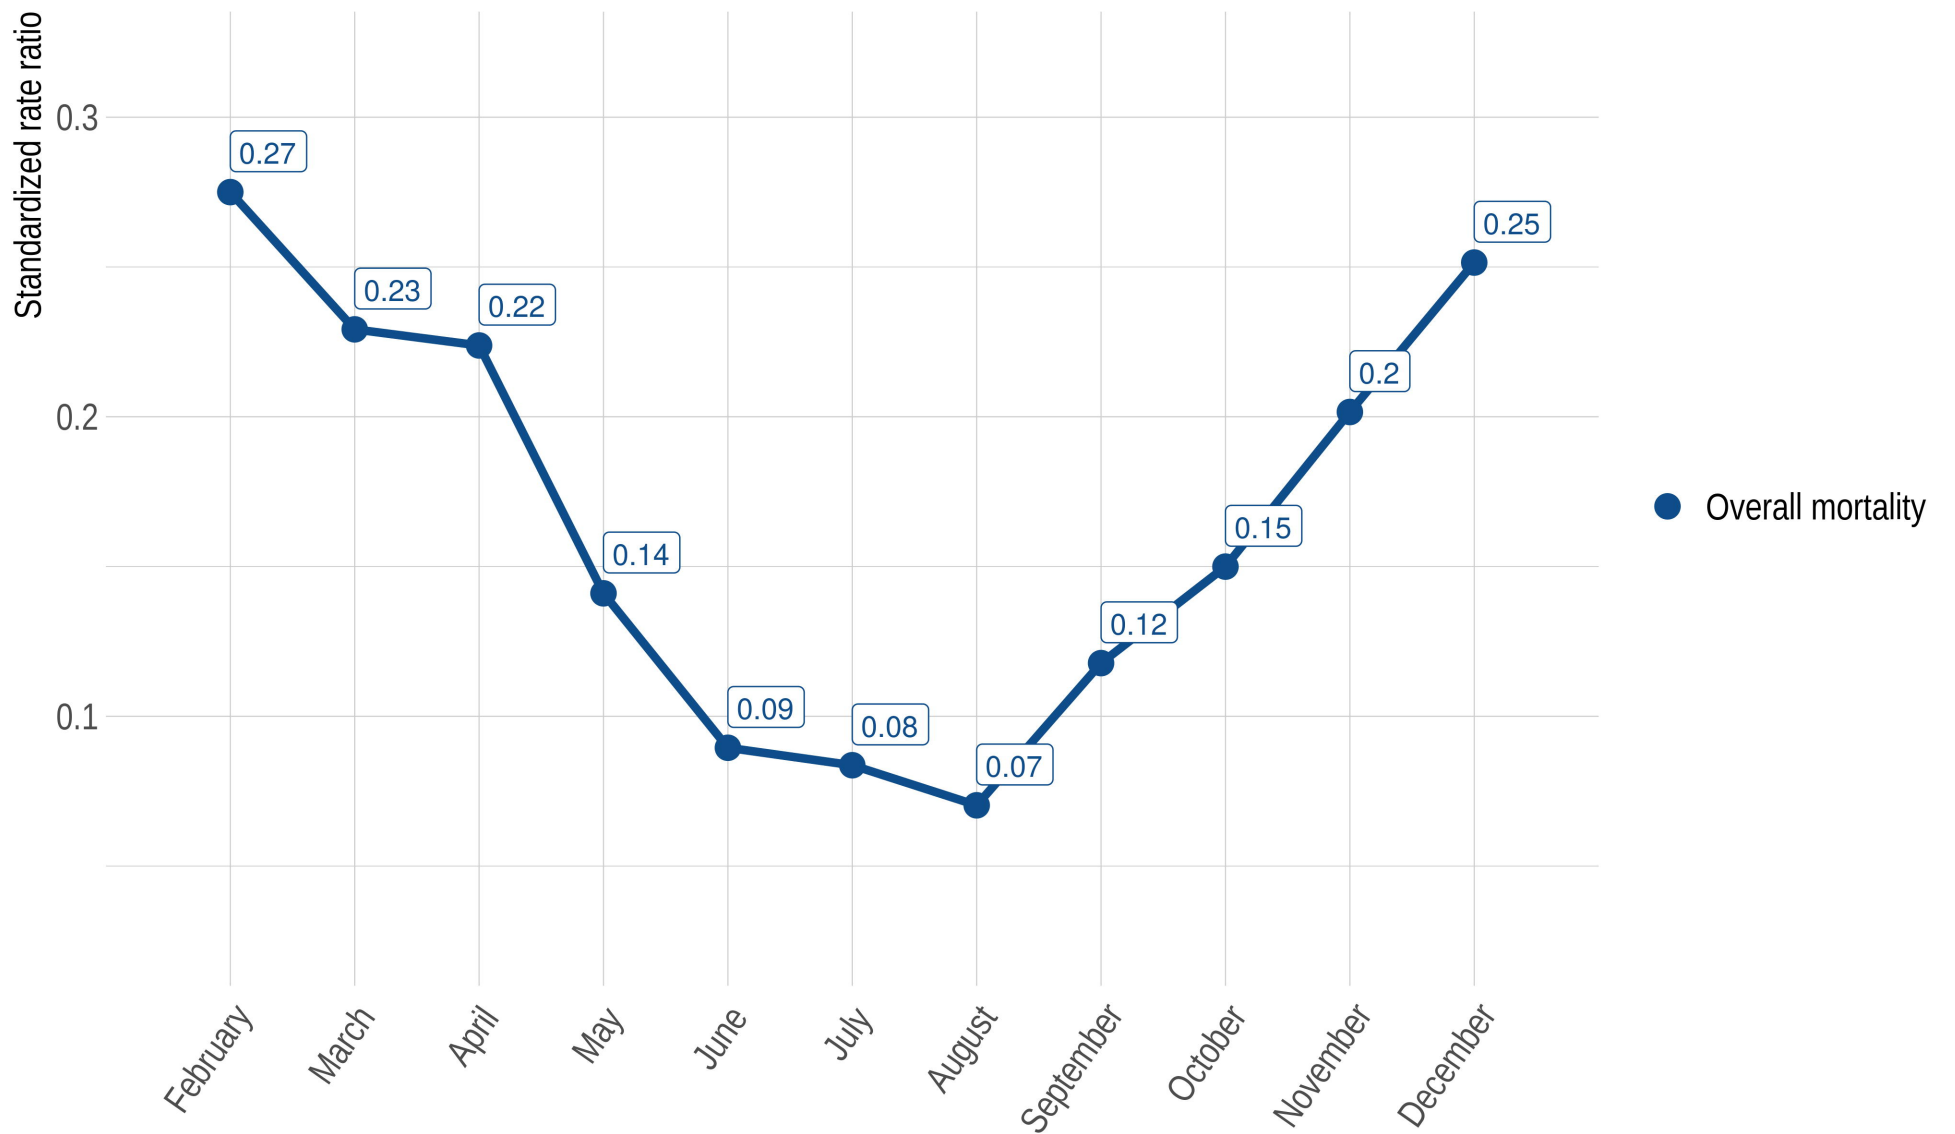

**A**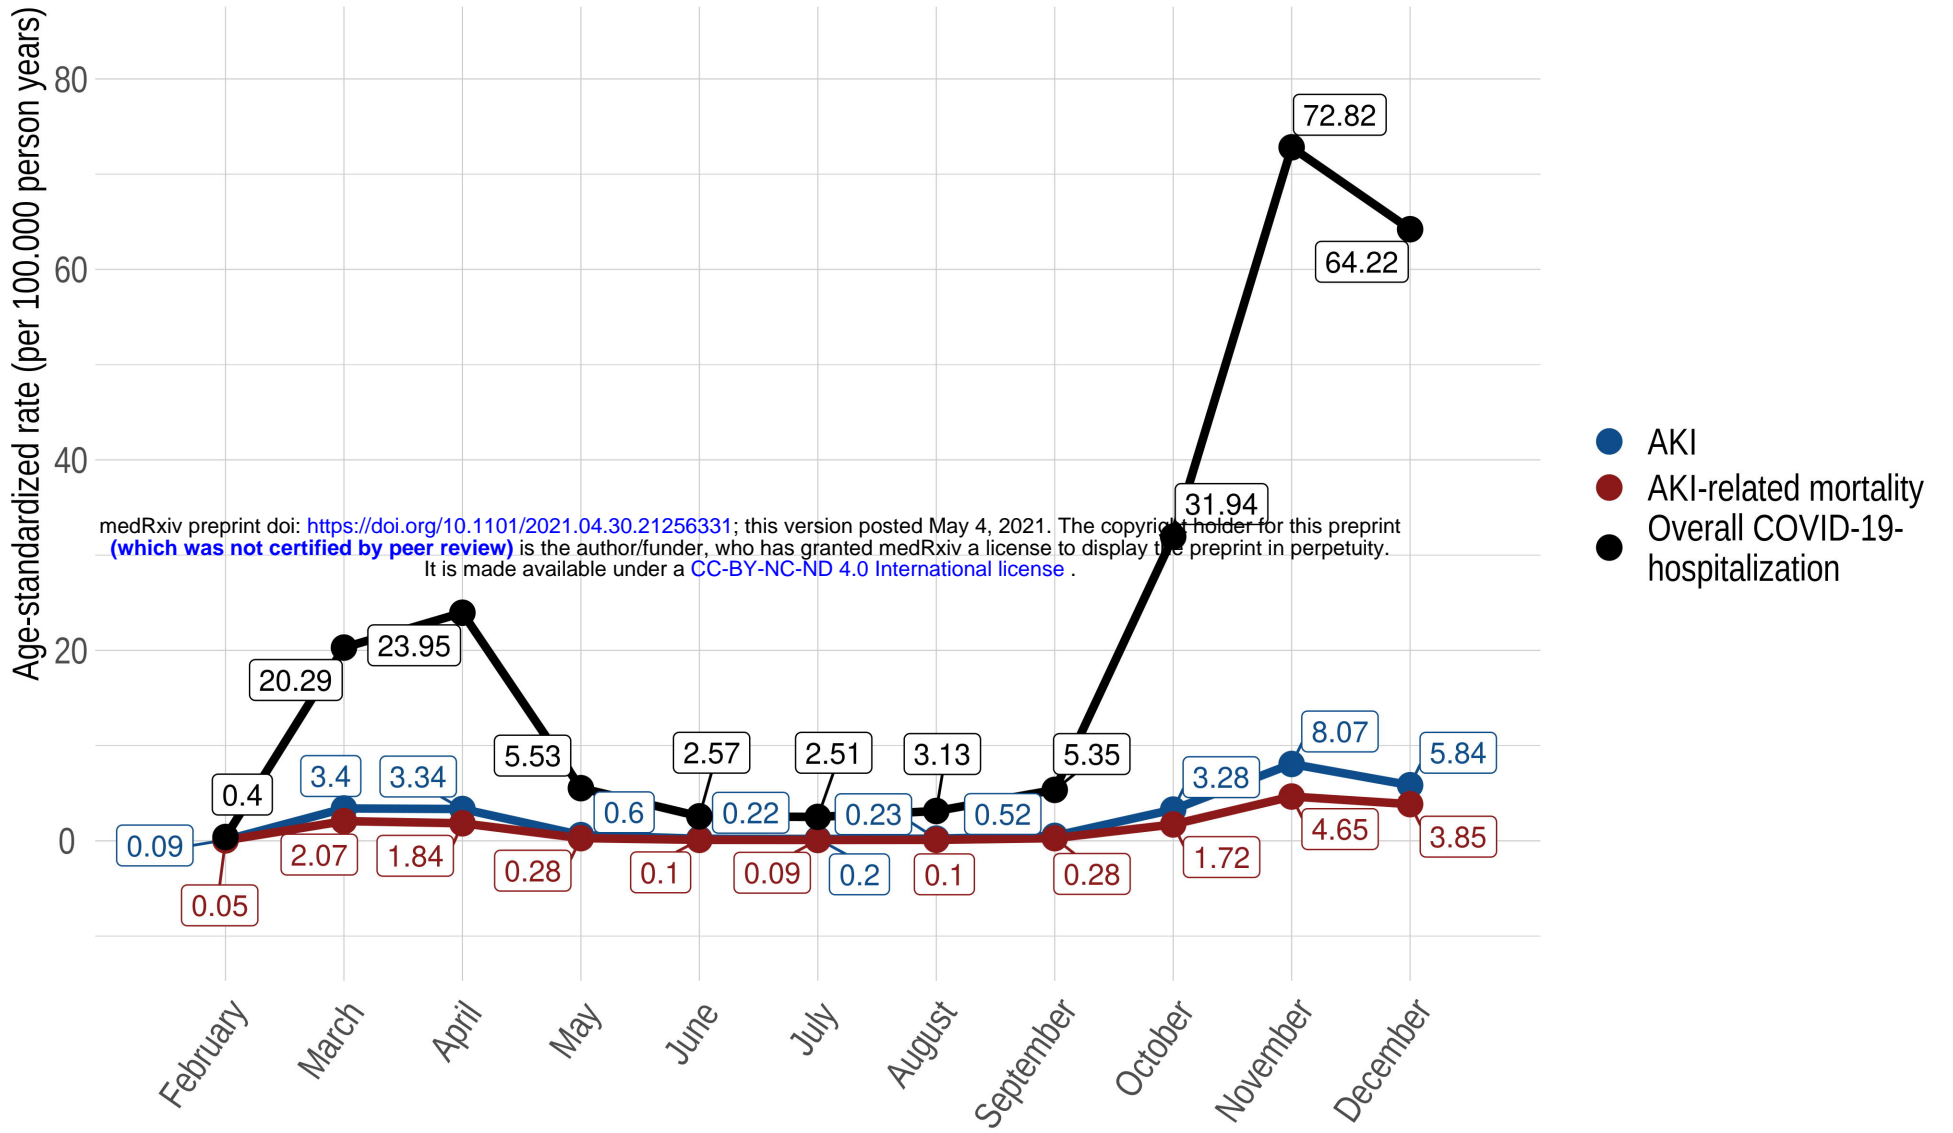**B**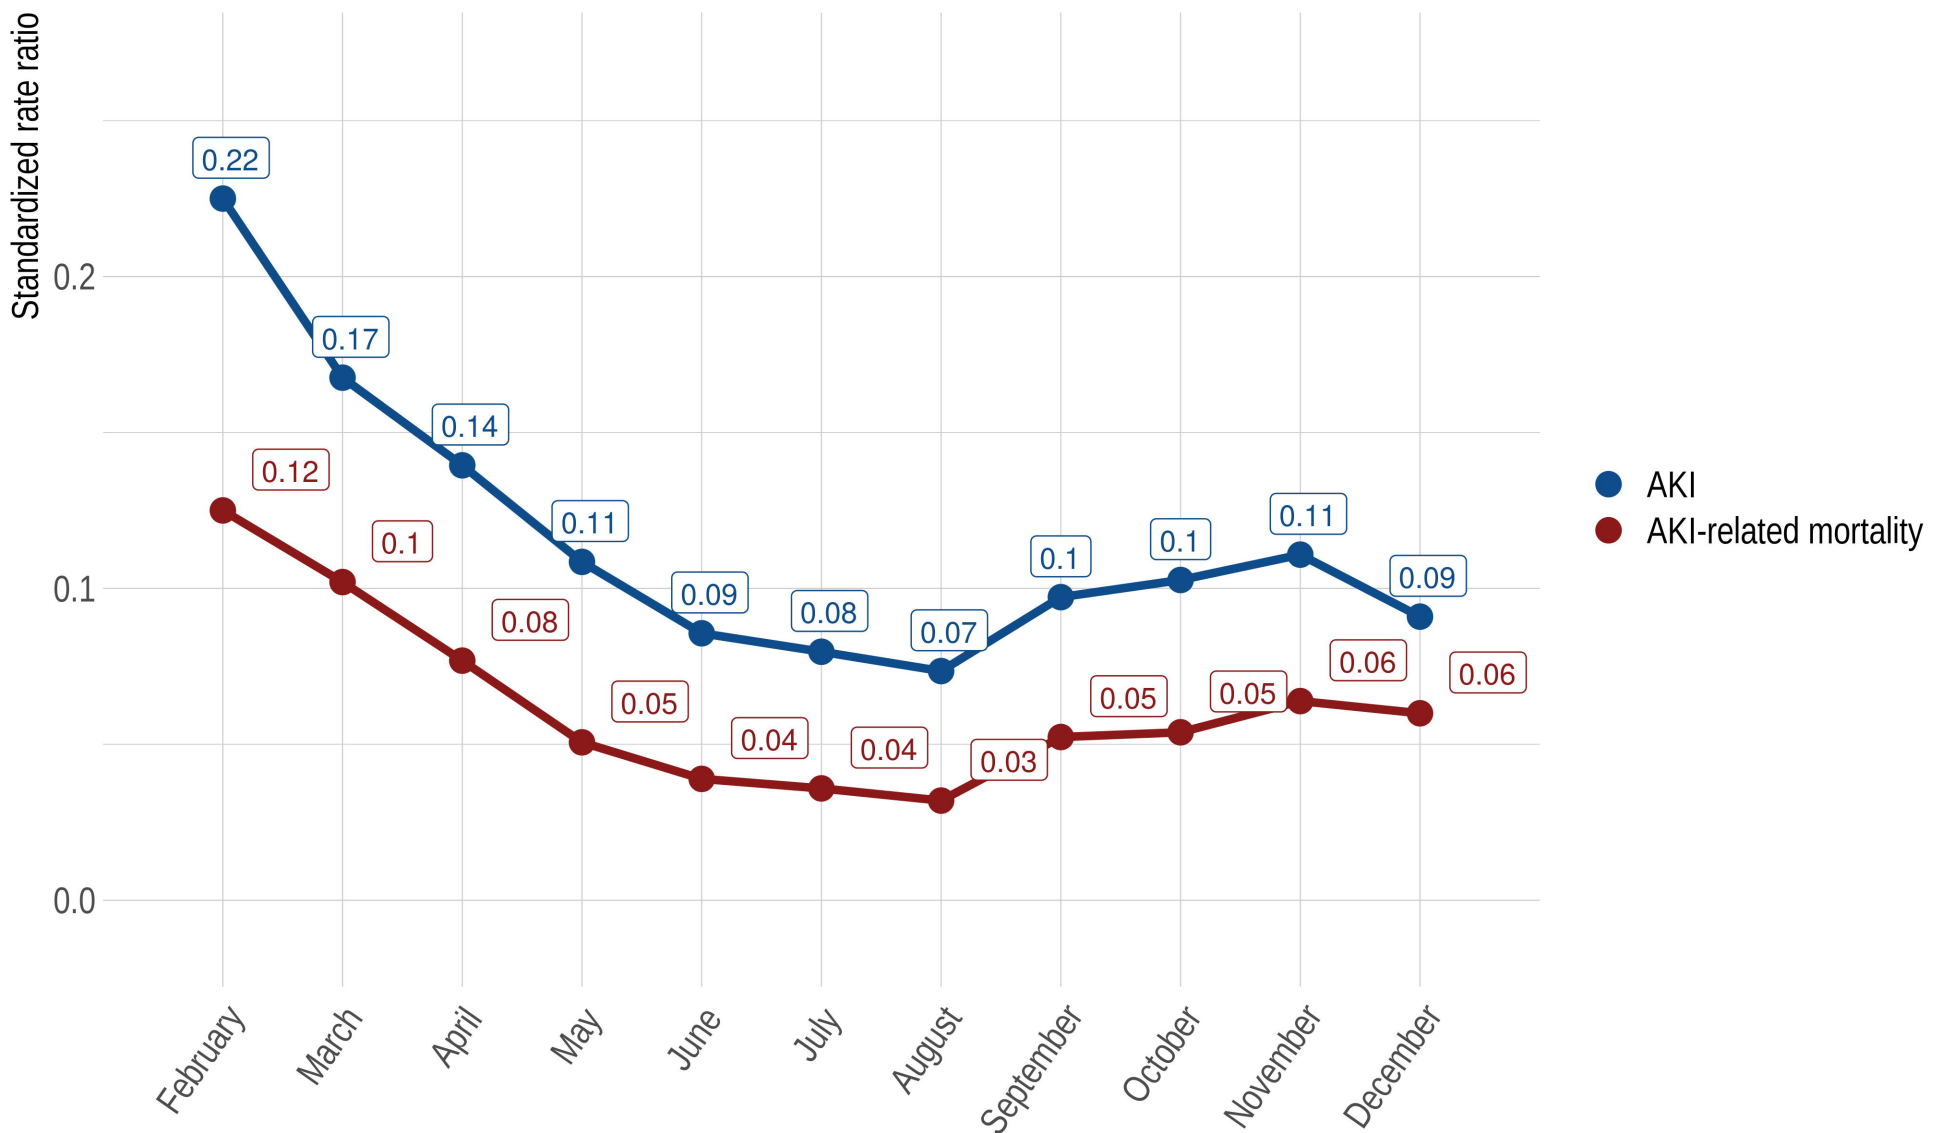

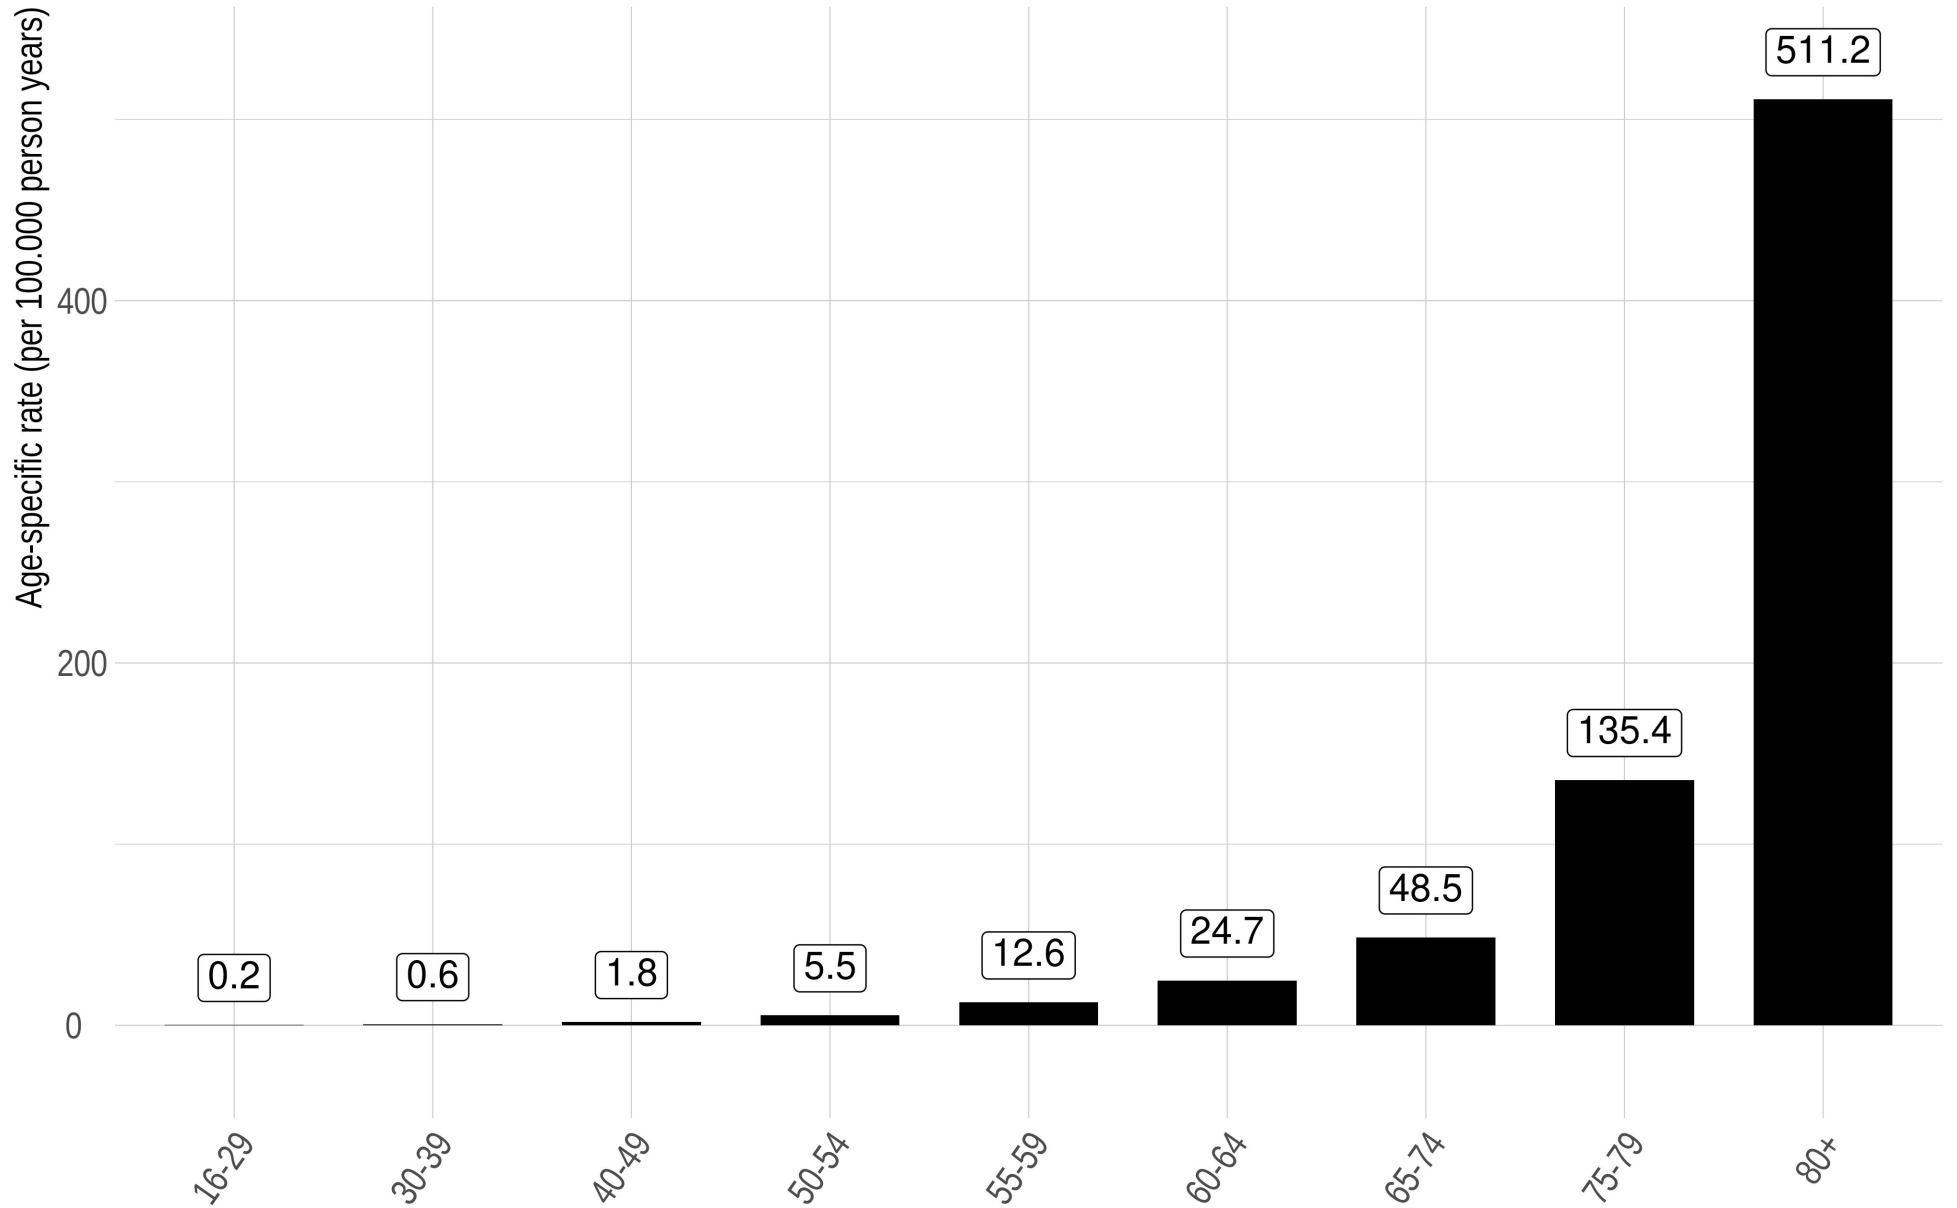

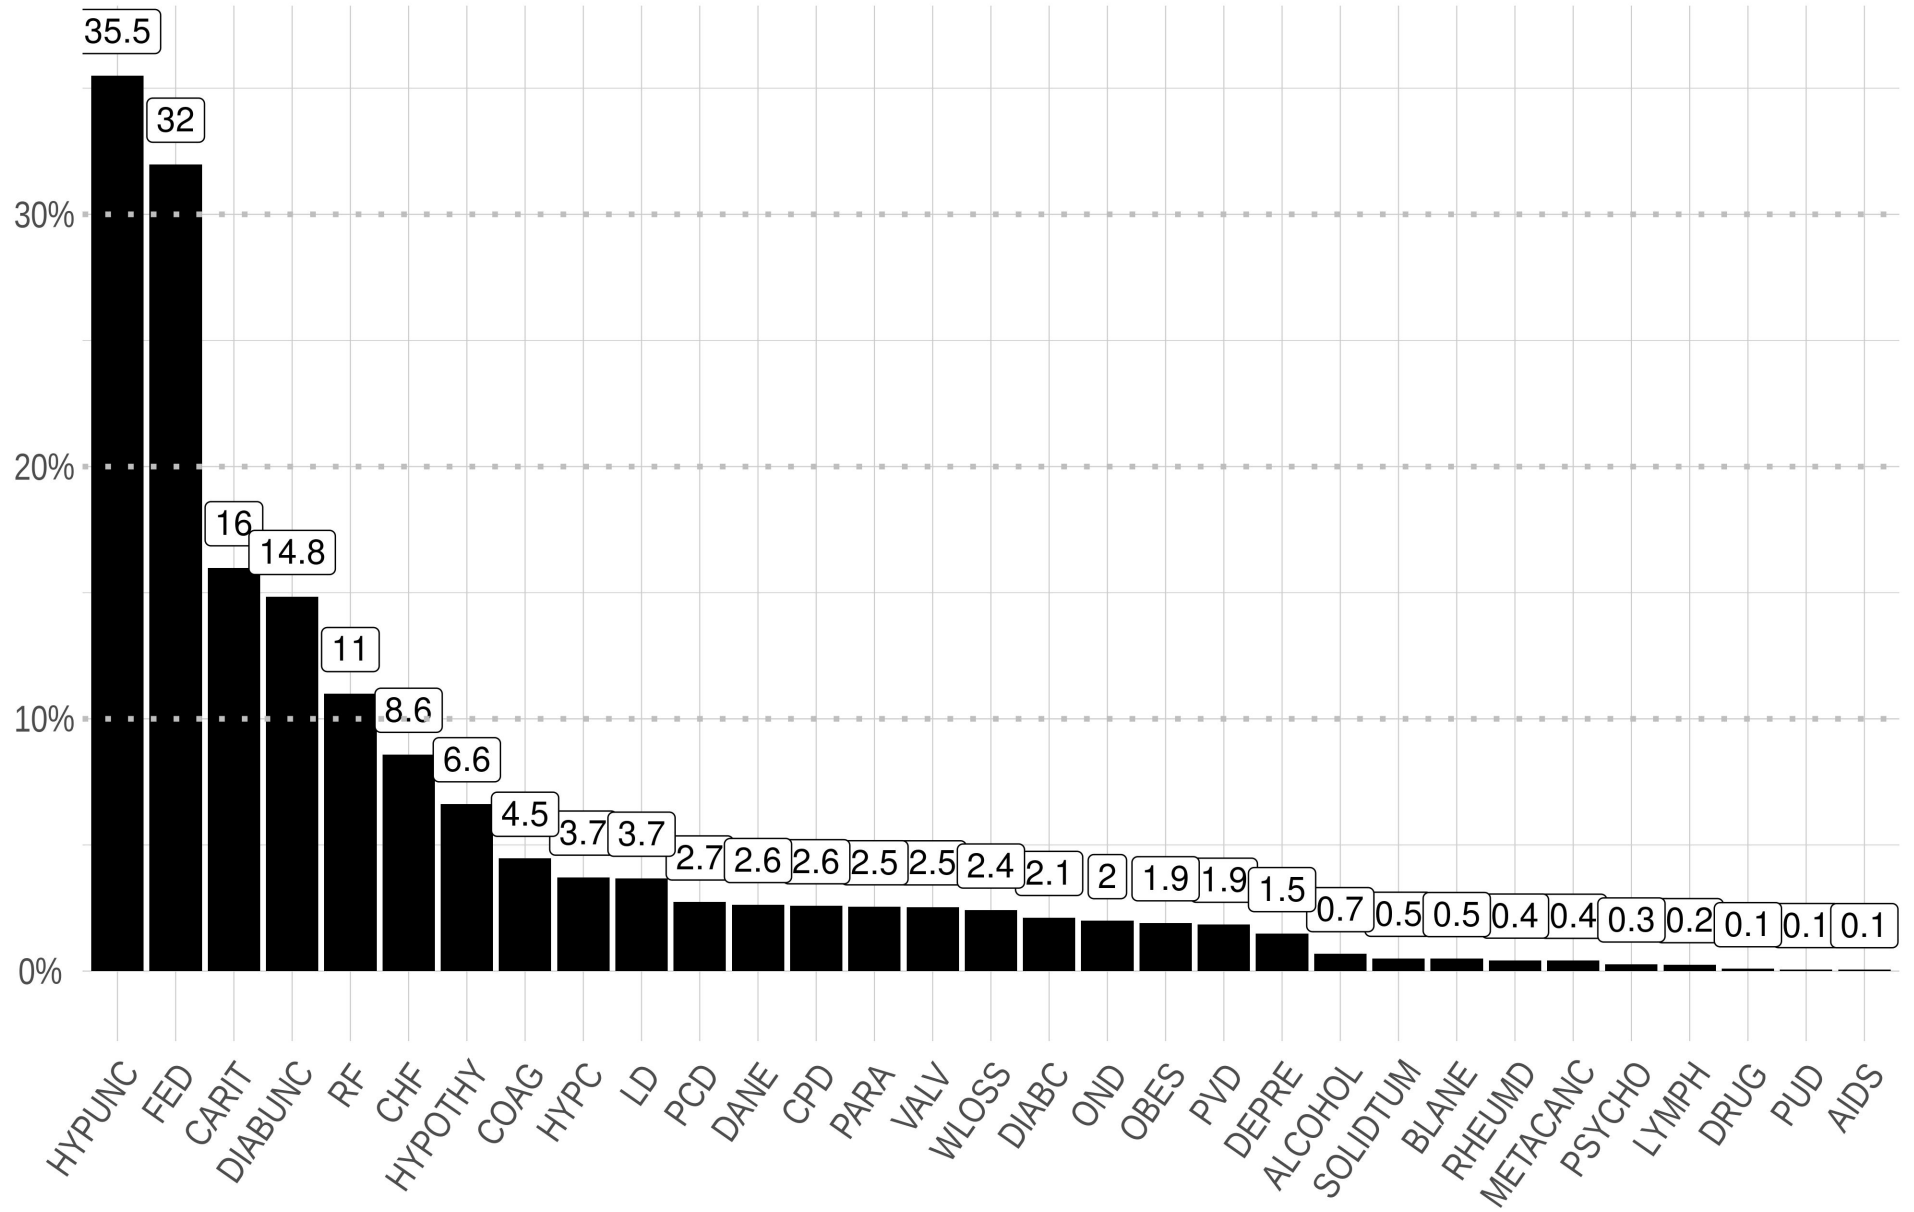

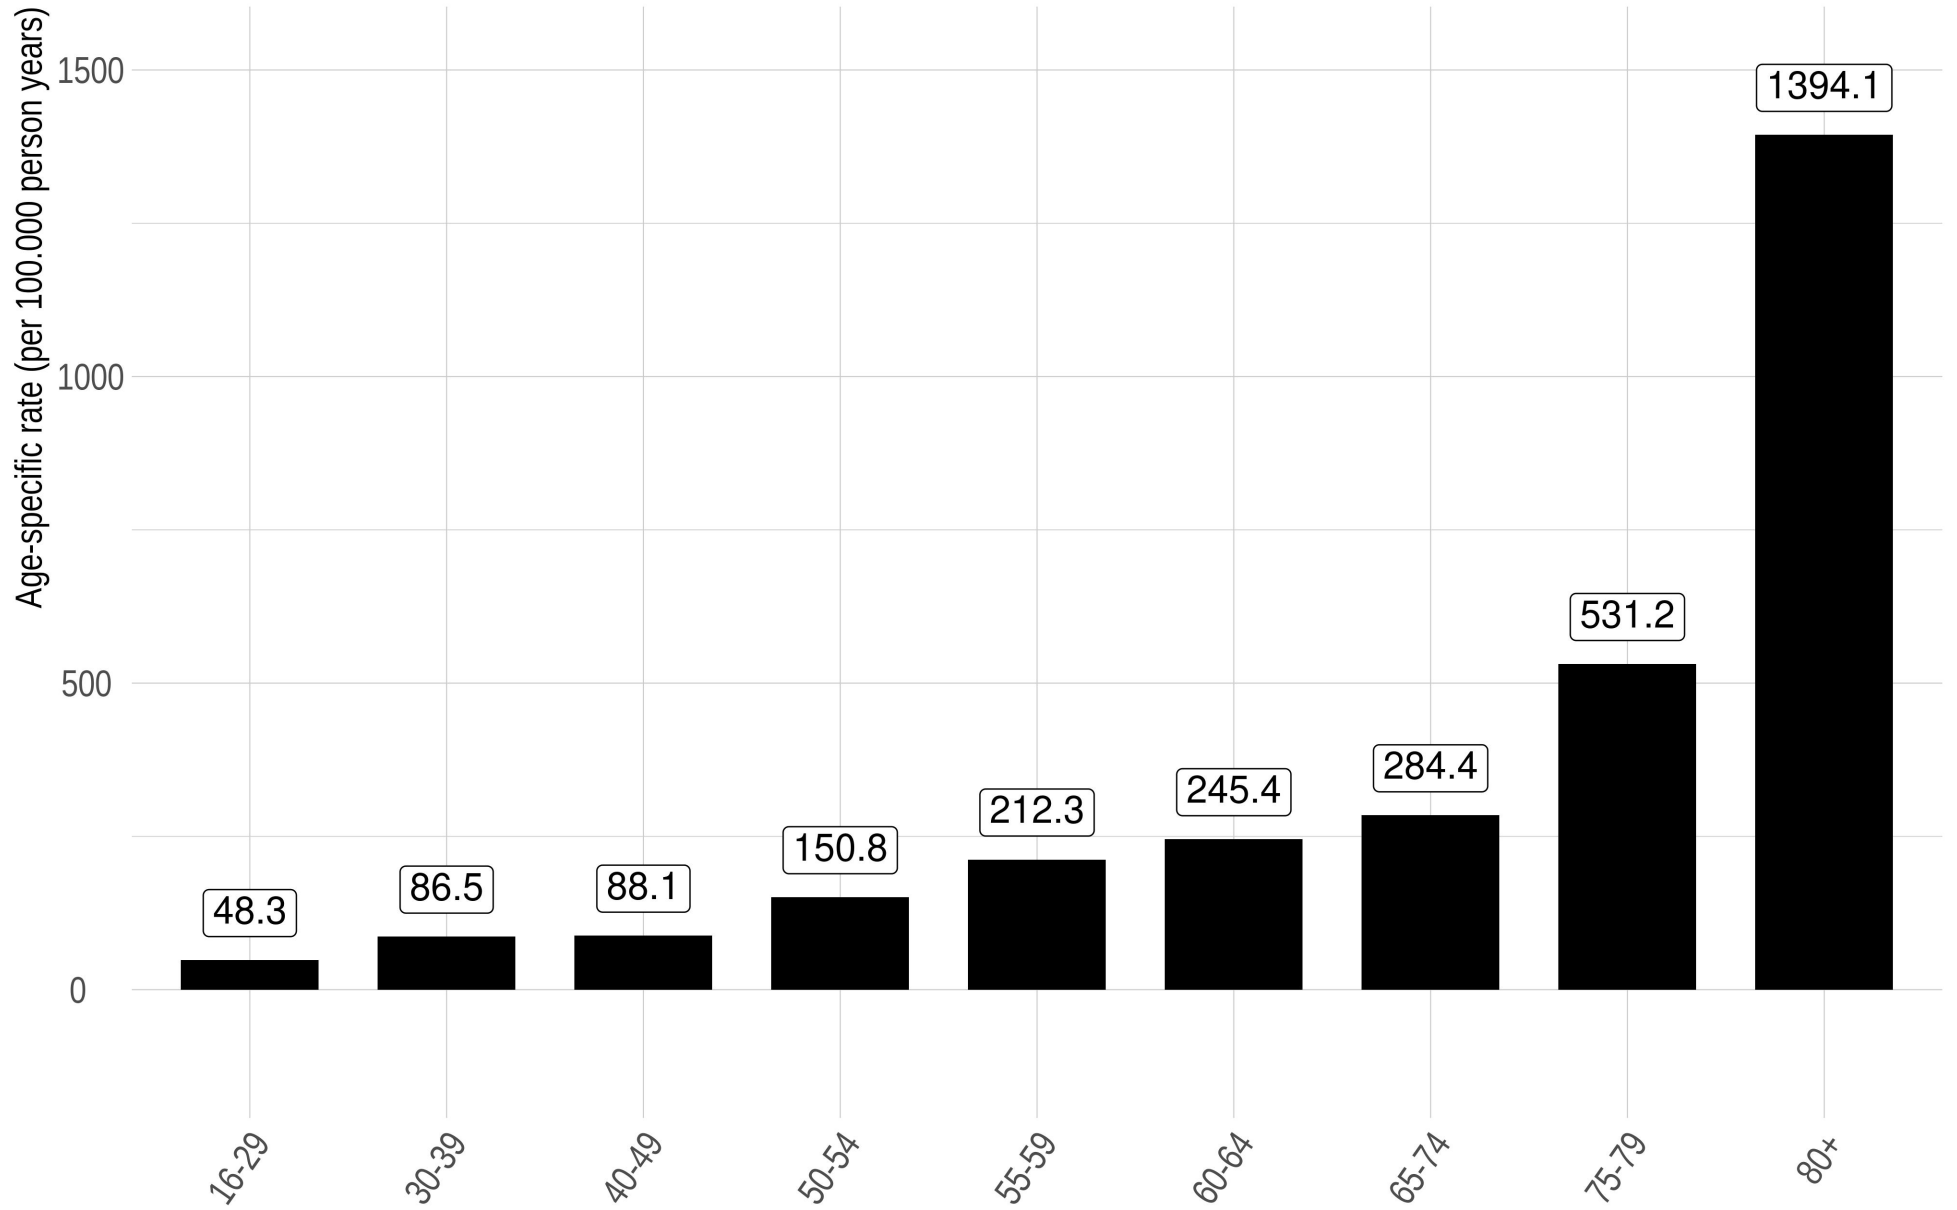

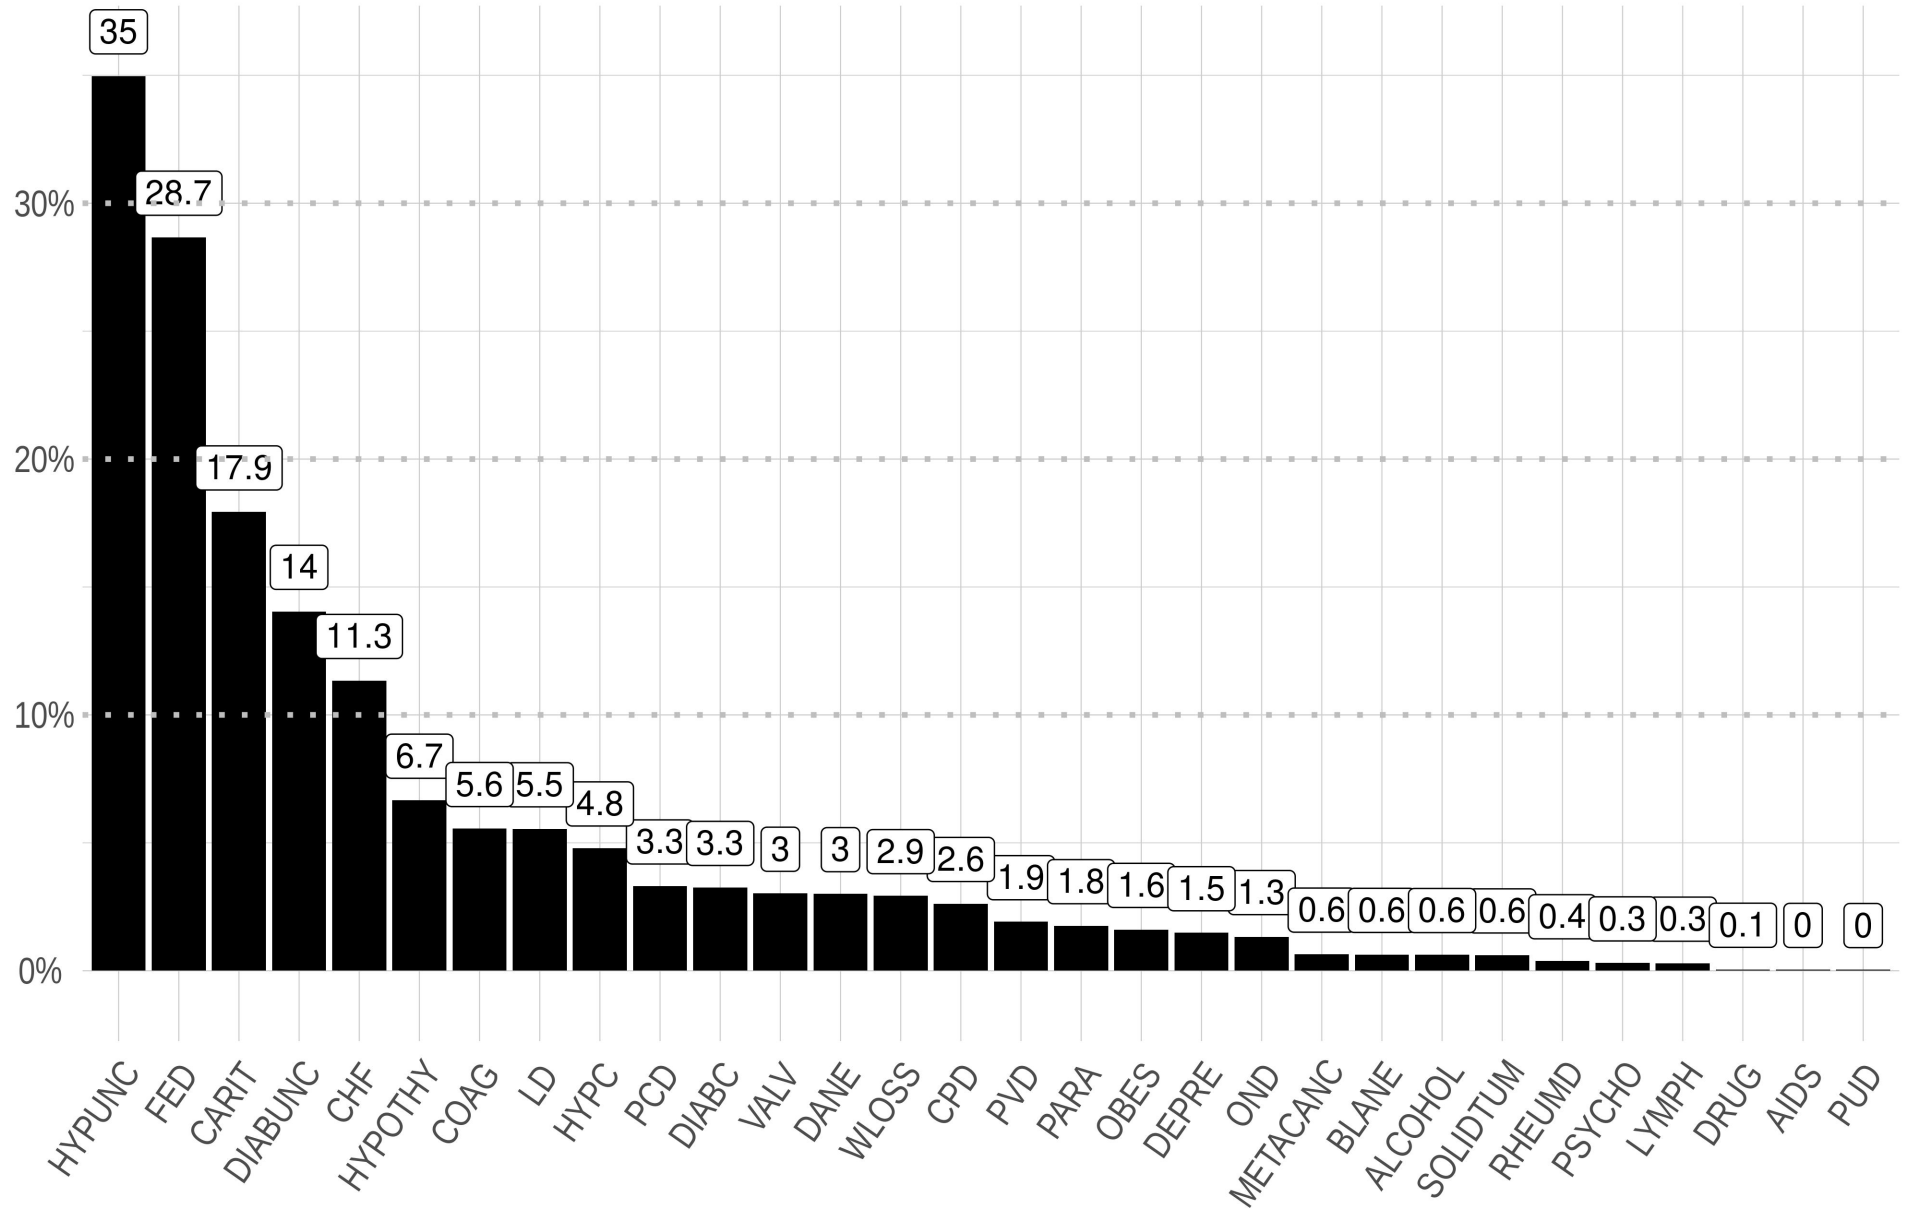

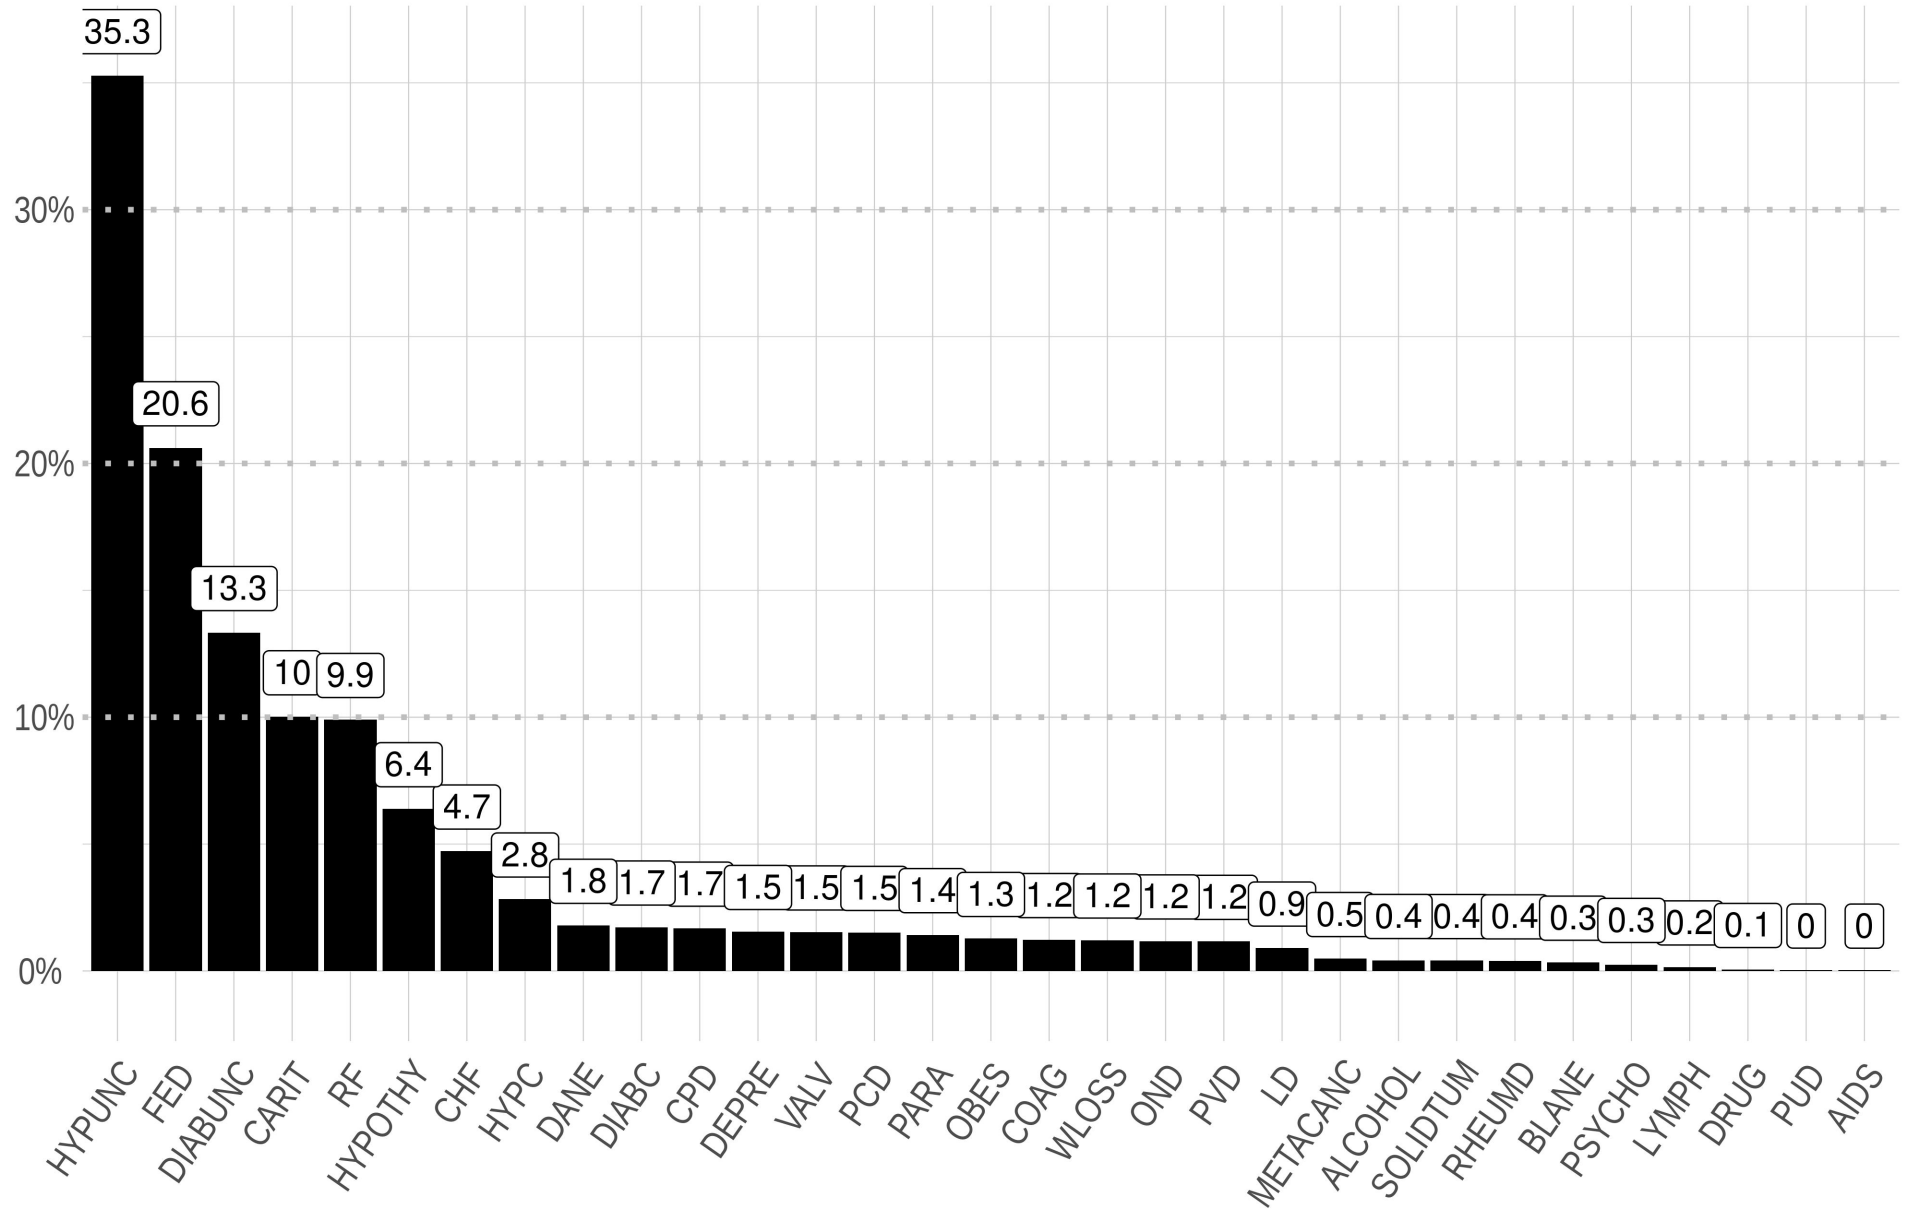

Source: https://medrxiv.org/content/10.1101/2021.04.30.21256331v1.full.pdf
